# Supplementary material for: Linking patient-reported oral and general health-related quality of life
Source: PeerJ. 2024 May 28;12:e17440. doi: 10.7717/peerj.17440 (PMC11141547; doi:10.7717/peerj.17440)
Supplement: Supplemental Information 1 [file peerj-12-17440-s001.xls]

## Sheet: Sheet1
subject_id	ohip_function	ohip_pain	ohip_appear	ohip_less_flav	ohip_diff_job	ohip5_sum	Has dental insurance (Yes/No)	Dental Insurance Type	age	gender	education	ethnicity	race (1=White, 2=Non-white)	gen_hlth	gen_qol	gen_phys_hlth	gen_mental_hlth	gen_social	gen_roles	gen_daily_act	gen_emot_prob	gen_fatigue	gen_pain_scale	mental_summary	physical_summary	upper_denture	lower_denture	upper_teeth_ct	lower_teeth_ct	teeth_ct
1	Fairly often	Fairly often	Occasionally	Never	Never	8	Yes	Employer-sponsored plan	37	Female	Some college or 2-year degree	NOT Hispanic or Latino	1	Good	Good	Fair	Very Good	Fair	Good	A little	Often	Mild	6	12	11	No	No	10	11	21
2	Hardly ever	Hardly ever	Occasionally	Hardly ever	Never	5	No		63	Female	Some college or 2-year degree	NOT Hispanic or Latino	1	Very Good	Excellent	Excellent	Very Good	Good	Good	Completely	Rarely	Mild	1	16	18	No	No	14	15	29
3	Fairly often	Occasionally	Occasionally	Hardly ever	Occasionally	10	No		58	Female	Some college or 2-year degree		1	Good	Good	Good	Good	Good	Good	Moderately	Sometimes	Moderate	5	11	12	No	No	14	12	26
4	Never	Never	Occasionally	Never	Never	2	Yes	Employer-sponsored plan	41	Female	4 year college graduate	NOT Hispanic or Latino	1	Very Good	Very Good	Very Good	Very Good	Very Good	Very Good	Mostly	Rarely	Moderate	1	16	15	No	No	12	12	24
5	Hardly ever	Hardly ever	Never	Never	Never	2	No		32	Female	Some college or 2-year degree	NOT Hispanic or Latino	1	Very Good	Excellent	Good	Good	Good	Good	Completely	Rarely	Mild	3	15	16	No	No	14	14	28
6	Hardly ever	Hardly ever	Never	Never	Hardly ever	3	Yes	Employer-sponsored plan	61	Female	More than 4-year college degree	NOT Hispanic or Latino	1	Excellent	Excellent	Excellent	Very Good	Very Good	Excellent	Completely	Sometimes	Moderate	2	15	17	No	No	14	14	28
7	Never	Never	Never	Never	Never	0	No		81	Male	High school graduate or GED	NOT Hispanic or Latino	1	Excellent	Excellent	Excellent	Excellent	Excellent	Excellent	Completely	Never	None	1	20	19	No	No	12	12	24
8	Occasionally	Occasionally	Never	Occasionally	Never	6	Yes	Public insurance	69	Male	High school graduate or GED	NOT Hispanic or Latino	1	Good	Excellent	Good	Excellent	Excellent	Very Good	Mostly	Never	Moderate	2	20	14	Yes	Yes	0	0	0
9	Never	Never	Never	Never	Never	0	Yes	Self-purchased private plan	66	Female	Some college or 2-year degree	NOT Hispanic or Latino	1	Very Good	Very Good	Good	Very Good	Very Good	Good	Completely	Never	Mild	4	17	15	No	No	14	14	28
10	Never	Never	Never	Never	Never	0	Yes	Employer-sponsored plan	41	Female	More than 4-year college degree		1	Very Good	Good	Good	Good	Very Good	Very Good	Completely	Sometimes	Moderate	5	12	14	No	No	13	14	27
12	Hardly ever	Hardly ever	Never	Never	Never	2	Yes	Public insurance	70	Male	More than 4-year college degree	NOT Hispanic or Latino	1	Fair	Very Good	Good	Excellent	Good	Good	Moderately	Never	Mild	4	17	13	No	No	12	12	24
13	Hardly ever	Hardly ever	Occasionally	Never	Never	4	No		69	Male	More than 4-year college degree	NOT Hispanic or Latino	1	Very Good	Very Good	Good	Very Good	Very Good	Very Good	Completely	Rarely	None	1	16	17	No	No	14	14	28
14	Never	Hardly ever	Never	Never	Never	1	Yes	Employer-sponsored plan	52	Female	Some college or 2-year degree	NOT Hispanic or Latino	1	Very Good	Very Good	Good	Very Good	Very Good	Very Good	Completely	Rarely	None	2	16	17	No	No	14	14	28
15	Hardly ever	Occasionally	Hardly ever	Never	Never	4	Yes	Employer-sponsored plan	58	Female	More than 4-year college degree	NOT Hispanic or Latino	1	Good	Very Good	Good	Very Good	Very Good	Very Good	Mostly	Rarely	Mild	1	16	15	No	No	14	14	28
16	Never	Hardly ever	Occasionally	Hardly ever	Hardly ever	5	Yes	Employer-sponsored plan	67	Male	More than 4-year college degree	NOT Hispanic or Latino	1	Very Good	Excellent	Very Good	Excellent	Excellent	Excellent	Completely	Never	Mild	0	20	18	No	No	13	14	27
17	Never	Hardly ever	Occasionally	Never	Never	3	No		46	Female	More than 4-year college degree	NOT Hispanic or Latino	1	Very Good	Very Good	Good	Fair	Good	Good	Completely	Sometimes	Severe	0	11	15	No	No	14	14	28
18	Never	Hardly ever	Hardly ever	Never	Never	2	No		49	Female	Some college or 2-year degree	NOT Hispanic or Latino	1	Good	Very Good	Very Good	Excellent	Very Good	Very Good	Completely	Never	None	0	18	19	No	No	14	14	28
19	Never	Never	Never	Never	Never	0	Yes	Employer-sponsored plan	58	Female	4 year college graduate	NOT Hispanic or Latino	1	Excellent	Excellent	Very Good	Excellent	Excellent	Excellent	Completely	Never	None	1	20	18	No	No	14	14	28
20	Hardly ever	Never	Never	Never	Never	1	Yes	Employer-sponsored plan	22	Female	4 year college graduate	NOT Hispanic or Latino	1	Very Good	Very Good	Very Good	Good	Excellent	Very Good	Moderately	Rarely	Mild	1	16	15	No	No	14	14	28
21	Hardly ever	Hardly ever	Never	Never	Never	2	Yes	Employer-sponsored plan	38	Male	4 year college graduate	NOT Hispanic or Latino	1	Excellent	Excellent	Excellent	Excellent	Excellent	Excellent	Completely	Rarely	Mild	0	19	19	No	No	14	14	28
22	Occasionally	Occasionally	Occasionally	Hardly ever	Hardly ever	8	No		65	Female	Some college or 2-year degree	NOT Hispanic or Latino	1	Fair	Good	Fair	Good	Good	Very Good	Moderately	Rarely	Mild	3	13	13	No	No	14	15	29
23	Hardly ever	Never	Hardly ever	Never	Never	2	Yes	Public insurance	48	Male	More than 4-year college degree	NOT Hispanic or Latino	1	Excellent	Excellent	Excellent	Excellent	Excellent	Excellent	Completely	Never	None	1	20	19	No	No	12	12	24
24	Occasionally	Hardly ever	Never	Never	Never	3	No		38	Female	4 year college graduate	NOT Hispanic or Latino	1	Very Good	Very Good	Very Good	Very Good	Very Good	Very Good	Completely	Never	Mild	3	17	17	No	No	16	15	31
25	Never	Hardly ever	Hardly ever	Never	Never	2	No		64	Female	More than 4-year college degree	NOT Hispanic or Latino	1	Excellent	Excellent	Excellent	Excellent	Excellent	Excellent	Completely	Never	None	0	20	20	No	No	14	13	27
27	Occasionally	Occasionally	Hardly ever	Never	Hardly ever	6	No		33	Female	More than 4-year college degree	NOT Hispanic or Latino	1	Good	Good	Good	Fair	Fair	Fair	Completely	Rarely	Moderate	1	11	15	No	No	14	14	28
28	Never	Never	Very often	Never	Never	4	Yes	Public insurance	37	Male	Some college or 2-year degree	NOT Hispanic or Latino	1	Fair	Very Good	Good	Good	Very Good	Very Good	Moderately	Rarely	Mild	0	15	15	No	No	13	14	27
29	Hardly ever	Hardly ever	Never	Never	Never	2	Yes	Public insurance	52	Female	Some college or 2-year degree	NOT Hispanic or Latino	1	Excellent	Excellent	Excellent	Very Good	Very Good	Very Good	Completely	Rarely	Mild	5	17	17	No	No	15	14	29
30	Occasionally	Occasionally	Fairly often	Hardly ever	Never	8	Yes	Self-purchased private plan	74	Female	Some college or 2-year degree	NOT Hispanic or Latino	1	Good	Good	Good	Very Good	Very Good	Very Good	Moderately	Rarely	Moderate	7	15	11	No	No	10	9	19
31	Occasionally	Occasionally	Hardly ever	Occasionally	Hardly ever	8	Yes	Public insurance	20	Male	Some college or 2-year degree	NOT Hispanic or Latino	1	Very Good	Very Good	Good	Very Good	Very Good	Excellent	Mostly	Often	Mild	0	15	16	No	No	13	15	28
32	Never	Hardly ever	Hardly ever	Never	Never	2	Yes	Employer-sponsored plan	42	Female	Some college or 2-year degree	NOT Hispanic or Latino	1	Excellent	Very Good	Very Good	Very Good	Very Good	Very Good	Completely	Often	None	2	15	18	No	No	14	14	28
33	Never	Never	Hardly ever	Never	Never	1	Yes	Self-purchased private plan	47	Male	Some college or 2-year degree	NOT Hispanic or Latino	1	Very Good	Excellent	Excellent	Excellent	Excellent	Excellent	Completely	Never	None	0	20	20	No	No	14	14	28
34	Never	Never	Never	Never	Never	0	Yes	Employer-sponsored plan	67	Female	Some college or 2-year degree	NOT Hispanic or Latino	1	Fair	Very Good	Good	Very Good	Very Good	Fair	Moderately	Never	Moderate	5	17	12	No	No	14	14	28
35	Very often	Occasionally	Very often	Very often	Fairly often	17	No		58	Female	More than 4-year college degree	NOT Hispanic or Latino	1	Very Good	Very Good	Excellent	Excellent	Very Good	Good	Completely	Never	Moderate	0	18	18	No	No	14	13	27
36	Never	Never	Occasionally	Never	Never	2	Yes	Employer-sponsored plan	38	Male	4 year college graduate	NOT Hispanic or Latino	1	Good	Very Good	Good	Very Good	Good	Good	Completely	Never	Mild	1	16	16	No	No	14	14	28
37	Hardly ever	Hardly ever	Hardly ever	Never	Never	3	Yes	Employer-sponsored plan	40	Female	4 year college graduate	NOT Hispanic or Latino	1	Good	Good	Good	Good	Good	Fair	Mostly	Sometimes	Mild	3	11	15	No	No	14	14	28
38	Never	Hardly ever	Occasionally	Never	Hardly ever	4	No		79	Male	High school graduate or GED	NOT Hispanic or Latino	1	Very Good	Good	Good	Fair	Fair	Fair	Mostly	Often	Severe	8	10	11	No	No	10	11	21
39	Hardly ever	Hardly ever	Never	Never	Never	2	Yes	Employer-sponsored plan	52	Female	4 year college graduate	NOT Hispanic or Latino	1	Good	Good	Good	Good	Fair	Good	Mostly	Often	Moderate	2	11	14	No	No	14	14	28
40	Hardly ever	Occasionally	Hardly ever	Hardly ever	Never	5	No		75	Female	Some college or 2-year degree	NOT Hispanic or Latino	1	Good	Good	Good	Good	Good	Good	Mostly	Rarely	Moderate	7	13	12	No	No	13	14	27
41	Never	Never	Never	Never	Never	0	No		36	Female	4 year college graduate		1	Very Good	Very Good	Very Good	Fair	Fair	Good	Completely	Sometimes	Moderate	0	10	17	No	No	14	14	28
42	Occasionally	Never	Occasionally	Never	Never	4	Yes	Employer-sponsored plan	48	Female	4 year college graduate	NOT Hispanic or Latino	1	Very Good	Very Good	Very Good	Very Good	Very Good	Excellent	Mostly	Rarely	Mild	2	16	16	No	No	14	14	28
43	Hardly ever	Hardly ever	Occasionally	Never	Never	4	No		26	Female	4 year college graduate	NOT Hispanic or Latino	1	Very Good	Very Good	Excellent	Good	Good	Good	Completely	Often	Mild	1	13	18	No	No	14	13	27
44	Hardly ever	Hardly ever	Never	Never	Never	2	Yes	Employer-sponsored plan	57	Male	4 year college graduate	NOT Hispanic or Latino	1	Very Good	Very Good	Very Good	Very Good	Very Good	Very Good	Completely	Rarely	Moderate	3	16	16	No	No	13	12	25
45	Hardly ever	Occasionally	Fairly often	Occasionally	Hardly ever	9	No		32	Male	High school graduate or GED	NOT Hispanic or Latino	2	Good	Good	Good	Poor	Poor	Fair	Moderately	Often	Moderate	3	8	13	No	No	14	13	27
46	Never	Never	Hardly ever	Never	Never	1	Yes	Employer-sponsored plan	41	Female	Some college or 2-year degree	NOT Hispanic or Latino	1	Good	Very Good	Very Good	Good	Very Good	Very Good	Completely	Rarely	Severe	2	15	15	No	No	12	14	26
47	Occasionally	Occasionally	Occasionally	Hardly ever	Never	7	Yes	Public insurance	61	Female	Some college or 2-year degree	NOT Hispanic or Latino	1	Fair	Very Good	Fair	Very Good	Very Good	Very Good	Completely	Never	Mild	6	17	14	No	No	11	14	25
48	Hardly ever	Never	Occasionally	Never	Never	3	Yes	Self-purchased private plan	65	Female	More than 4-year college degree		1	Very Good	Excellent	Very Good	Very Good	Very Good	Very Good	Mostly	Rarely	Mild	3	17	16	No	No	14	14	28
49	Never	Never	Never	Never	Never	0	Yes	Self-purchased private plan	72	Female	More than 4-year college degree	Hispanic or Latino	1	Good	Very Good	Good	Very Good	Excellent	Excellent	Completely	Never	Mild	5	18	15	No	No	14	13	27
50	Never	Never	Hardly ever	Never	Never	1	No		68	Male	4 year college graduate	NOT Hispanic or Latino	1	Very Good	Excellent	Very Good	Excellent	Excellent	Excellent	Completely	Never	None	0	20	19	No	No	14	14	28
51	Occasionally	Hardly ever	Occasionally	Never	Hardly ever	6	Yes	Employer-sponsored plan	52	Female	More than 4-year college degree	NOT Hispanic or Latino	1	Very Good	Very Good	Very Good	Very Good	Very Good	Excellent	Completely	Rarely	Mild	2	16	17	No	No	14	14	28
52	Never	Never	Occasionally	Never	Never	2	No		29	Female	More than 4-year college degree	NOT Hispanic or Latino	1	Very Good	Very Good	Very Good	Good	Good	Good	Completely	Often	Mild	0	13	18	No	No	14	14	28
53	Never	Hardly ever	Hardly ever	Never	Never	2	Yes	Employer-sponsored plan	30	Female	Some college or 2-year degree	NOT Hispanic or Latino	1	Very Good	Excellent	Very Good	Very Good	Very Good	Very Good	Completely	Rarely	Mild	0	17	18	No	No	14	14	28
54	Fairly often	Occasionally	Very often	Never	Never	9	No		61	Female	Some college or 2-year degree	NOT Hispanic or Latino	1	Good	Good	Good	Good	Very Good	Very Good	Mostly	Rarely	Mild	3	14	15	No	No	14	13	27
55	Hardly ever	Never	Never	Never	Never	1	No		69	Female	Some college or 2-year degree	NOT Hispanic or Latino	1	Excellent	Excellent	Good	Excellent	Excellent	Excellent	Completely	Rarely	Mild	8	19	14	No	No	14	14	28
56	Hardly ever	Hardly ever	Hardly ever	Hardly ever	Hardly ever	5	Don't know/Not sure		69	Female	High school graduate or GED	NOT Hispanic or Latino	1	Good	Very Good	Very Good	Excellent	Excellent	Excellent	Completely	Rarely	Mild	1	18	17	No	No	14	14	28
57	Hardly ever	Never	Hardly ever	Never	Never	2	Yes	Employer-sponsored plan	54	Female	More than 4-year college degree	NOT Hispanic or Latino	1	Very Good	Excellent	Very Good	Excellent	Very Good	Excellent	Completely	Never	Mild	0	19	18	No	No	14	14	28
58	Never	Never	Never	Never	Never	0	Yes	Public insurance	73	Female	High school graduate or GED	NOT Hispanic or Latino	1	Excellent	Excellent	Excellent	Excellent	Excellent	Excellent	Completely	Never	None	0	20	20	No	No	10	14	24
59	Never	Hardly ever	Hardly ever	Never	Never	2	Yes	Employer-sponsored plan	31	Female	More than 4-year college degree	NOT Hispanic or Latino	1	Very Good	Very Good	Very Good	Very Good	Very Good	Very Good	Completely	Sometimes	Mild	1	14	17	No	No	14	12	26
60	Hardly ever	Occasionally	Never	Never	Never	3	Yes	Public insurance	40	Male	High school graduate or GED	NOT Hispanic or Latino	1	Good	Good	Fair	Good	Good	Good	Completely	Rarely	Moderate	1	13	14	No	No	16	16	32
61	Hardly ever	Occasionally	Occasionally	Never	Never	5	Yes	Employer-sponsored plan	42	Female	More than 4-year college degree	Hispanic or Latino	1	Good	Good	Very Good	Very Good	Very Good	Very Good	Completely	Never	Mild	0	16	18	No	No	14	14	28
62	Hardly ever	Hardly ever	Occasionally	Never	Never	4	Yes	Employer-sponsored plan	57	Male	High school graduate or GED		1	Fair	Fair	Fair	Good	Good	Fair	Not at all	Rarely	None	3	12	12	No	No	14	13	27
63	Never	Hardly ever	Hardly ever	Never	Never	2	Yes	Employer-sponsored plan	47	Female	Some college or 2-year degree	NOT Hispanic or Latino	1	Good	Very Good	Good	Very Good	Very Good	Very Good	Completely	Rarely	Mild	2	16	16	No	No	11	14	25
79	Hardly ever	Hardly ever	Hardly ever	Occasionally	Never	5	Yes	Self-purchased private plan	71	Male	4 year college graduate	NOT Hispanic or Latino	1	Good	Very Good	Good	Very Good	Very Good	Very Good	Mostly	Never	None	2	17	16	No	No	13	13	26
80	Hardly ever	Hardly ever	Hardly ever	Hardly ever	Never	4	Yes	Employer-sponsored plan	54	Female	4 year college graduate	NOT Hispanic or Latino	1	Very Good	Very Good	Very Good	Very Good	Very Good	Very Good	Completely	Never	None	0	17	19	No	No	14	14	28
81	Never	Never	Never	Never	Never	0	Yes	Employer-sponsored plan	51	Female	More than 4-year college degree	NOT Hispanic or Latino	1	Good	Very Good	Good	Very Good	Very Good	Very Good	Mostly	Rarely	Mild	5	16	14	No	No	14	15	29
82	Hardly ever	Never	Never	Never	Never	1	Yes	Employer-sponsored plan	53	Female	4 year college graduate	NOT Hispanic or Latino	1	Very Good	Very Good	Very Good	Very Good	Very Good	Very Good	Completely	Never	Moderate	5	17	15	No	No	14	14	28
83	Never	Never	Never	Never	Never	0	Yes	Employer-sponsored plan	54	Female	More than 4-year college degree	NOT Hispanic or Latino	1	Good	Good	Good	Very Good	Good	Good	Mostly	Rarely	Mild	2	14	15	No	No	14	14	28
84	Never	Never	Never	Never	Never	0	Yes	Employer-sponsored plan	41	Female	4 year college graduate	NOT Hispanic or Latino	1	Very Good	Very Good	Very Good	Very Good	Very Good	Very Good	Completely	Rarely	Mild	0	16	18	No	No	14	14	28
85	Never	Never	Hardly ever	Never	Never	1	Yes	Employer-sponsored plan	52	Male	4 year college graduate	NOT Hispanic or Latino	1	Very Good	Very Good	Good	Very Good	Good	Excellent	Completely	Never	Mild	4	16	15	No	No	14	14	28
86	Hardly ever	Hardly ever	Hardly ever	Hardly ever	Hardly ever	5	Yes	Employer-sponsored plan	33	Male	More than 4-year college degree	NOT Hispanic or Latino	1	Very Good	Very Good	Very Good	Very Good	Very Good	Very Good	Mostly	Rarely	Mild	1	16	16	No	No	14	14	28
87	Never	Never	Never	Never	Never	0	Yes	Employer-sponsored plan	42	Male	More than 4-year college degree	NOT Hispanic or Latino	1	Excellent	Excellent	Excellent	Excellent	Excellent	Excellent	Completely	Never	Mild	1	20	18	No	No	14	14	28
88	Never	Never	Never	Never	Never	0	Yes	Employer-sponsored plan	49	Female	More than 4-year college degree	NOT Hispanic or Latino	1	Excellent	Excellent	Excellent	Excellent	Excellent	Excellent	Completely	Never	None	2	20	19	No	No	14	14	28
89	Occasionally	Occasionally	Occasionally	Occasionally	Occasionally	10	Yes	Employer-sponsored plan	18	Female	High school graduate or GED	Hispanic or Latino	2	Very Good	Very Good	Very Good	Good	Very Good	Very Good	Mostly	Sometimes	Mild	6	13	15	No	No	14	13	27
90	Hardly ever	Hardly ever	Hardly ever	Never	Never	3	Yes	Employer-sponsored plan	48	Female	4 year college graduate	NOT Hispanic or Latino	1	Excellent	Excellent	Very Good	Very Good	Very Good	Very Good	Completely	Never	None	1	18	18	No	No	14	14	28
91	Hardly ever	Never	Hardly ever	Never	Never	2	Yes	Employer-sponsored plan	52	Male	More than 4-year college degree	NOT Hispanic or Latino	1	Excellent	Excellent	Excellent	Very Good	Excellent	Excellent	Completely	Rarely	Mild	1	18	18	No	No	16	16	32
92	Hardly ever	Hardly ever	Never	Hardly ever	Never	3	Yes	Employer-sponsored plan	45	Female	More than 4-year college degree	NOT Hispanic or Latino	1	Excellent	Excellent	Excellent	Excellent	Excellent	Excellent	Completely	Never	None	0	20	20	No	No	14	14	28
93	Hardly ever	Occasionally	Hardly ever	Never	Never	4	Yes	Employer-sponsored plan	62	Male	Some college or 2-year degree	NOT Hispanic or Latino	1	Very Good	Very Good	Good	Very Good	Very Good	Very Good	Completely	Never	Moderate	2	17	15	No	No	13	14	27
94	Occasionally	Never	Hardly ever	Never	Never	3	Yes	Employer-sponsored plan	61	Female	4 year college graduate	NOT Hispanic or Latino	1	Very Good	Very Good	Very Good	Very Good	Very Good	Very Good	Completely	Rarely	None	0	16	19	No	No	12	14	26
95	Hardly ever	Hardly ever	Hardly ever	Never	Never	3	Yes	Employer-sponsored plan	64	Female	Some college or 2-year degree		1	Good	Good	Good	Good	Good	Good	Mostly	Never	Mild	5	14	14	No	No	14	12	26
96	Hardly ever	Occasionally	Occasionally	Occasionally	Hardly ever	8	Yes	Employer-sponsored plan	39	Female	Some college or 2-year degree	NOT Hispanic or Latino	1	Good	Good	Good	Good	Good	Good	Mostly	Often	Moderate	3	12	14	No	No	14	14	28
97	Occasionally	Hardly ever	Hardly ever	Hardly ever	Hardly ever	6	Yes	Employer-sponsored plan	59	Male	4 year college graduate		1	Good	Good	Good	Good	Good	Good	Moderately	Often	Moderate	8	12	11	No	No	14	14	28
98	Occasionally	Hardly ever	Occasionally	Never	Never	5	Yes	Employer-sponsored plan	50	Female	More than 4-year college degree		1	Good	Very Good	Good	Very Good	Good	Excellent	Completely	Rarely	Mild	6	15	15	No	No	14	14	28
99	Never	Never	Never	Never	Never	0	No		63	Female	Some college or 2-year degree	NOT Hispanic or Latino	1	Very Good	Excellent	Very Good	Excellent	Excellent	Excellent	Completely	Rarely	None	0	19	19	No	No	14	14	28
100	Never	Never	Never	Never	Never	0	Yes	Employer-sponsored plan	56	Female	More than 4-year college degree	NOT Hispanic or Latino	1	Very Good	Very Good	Very Good	Very Good	Very Good	Very Good	Completely	Never	Mild	1	17	17	No	No	14	14	28
101	Never	Never	Never	Never	Never	0	No		52	Female	More than 4-year college degree		1	Good	Good	Good	Good	Good	Good	Completely	Never	Mild	1	14	16	No	No	12	14	26
102	Never	Hardly ever	Occasionally	Never	Never	3	Yes	Employer-sponsored plan	60	Female	More than 4-year college degree	NOT Hispanic or Latino	1	Very Good	Excellent	Very Good	Very Good	Excellent	Excellent	Completely	Rarely	Mild	5	18	16	No	No	14	14	28
103	Never	Never	Never	Never	Never	0	Yes	Employer-sponsored plan	49	Male	4 year college graduate	NOT Hispanic or Latino	1	Very Good	Very Good	Very Good	Very Good	Very Good	Very Good	Completely	Never	None	0	17	19	No	No	14	14	28
104	Never	Never	Never	Never	Never	0	Yes	Employer-sponsored plan	22	Female	More than 4-year college degree	NOT Hispanic or Latino	1	Poor	Poor	Poor	Poor	Poor	Poor	A little	Sometimes	Moderate	5	5	9	No	No	14	14	28
105	Never	Never	Occasionally	Never	Never	2	Yes	Employer-sponsored plan	76	Male	4 year college graduate	NOT Hispanic or Latino	1	Very Good	Very Good	Very Good	Very Good	Very Good	Very Good	Completely	Rarely	None	0	16	19	No	No	14	14	28
106	Never	Occasionally	Occasionally	Never	Never	4	Yes	Employer-sponsored plan	18	Female	High school graduate or GED	NOT Hispanic or Latino	1	Good	Very Good	Good	Poor	Good	Very Good	Completely	Always	Moderate	6	9	14	No	No	14	14	28
107	Never	Never	Never	Never	Never	0	Yes	Employer-sponsored plan	51	Female	More than 4-year college degree	NOT Hispanic or Latino	1	Very Good	Excellent	Very Good	Very Good	Excellent	Very Good	Completely	Rarely	Mild	2	18	17	No	No	14	14	28
109	Fairly often	Hardly ever	Fairly often	Never	Fairly often	10	Yes	Dont know/Other	18	Female	Some college or 2-year degree	Hispanic or Latino	1	Very Good	Excellent	Very Good	Good	Very Good	Very Good	Completely	Sometimes	None	2	14	18	No	No	14	14	28
110	Occasionally	Occasionally	Hardly ever	Hardly ever	Never	6	Yes	Employer-sponsored plan	19	Female	Some college or 2-year degree	NOT Hispanic or Latino	2	Good	Fair	Fair	Poor	Fair	Good	Mostly	Always	Moderate	2	6	13	No	No	14	14	28
111	Never	Never	Never	Never	Never	0	Yes	Employer-sponsored plan	40	Male	More than 4-year college degree	NOT Hispanic or Latino	1	Excellent	Excellent	Excellent	Very Good	Excellent	Excellent	Completely	Rarely	Mild	1	18	18	No	No	14	14	28
112	Never	Never	Fairly often	Never	Never	3	Yes	Employer-sponsored plan	45	Male	More than 4-year college degree	NOT Hispanic or Latino	1	Very Good	Very Good	Very Good	Good	Good	Good	Mostly	Often	Moderate	5	13	14	No	No	15	15	30
113	Occasionally	Occasionally	Hardly ever	Hardly ever	Hardly ever	7	Yes	Self-purchased private plan	59	Female	More than 4-year college degree	NOT Hispanic or Latino	1	Very Good	Very Good	Very Good	Very Good	Very Good	Very Good	Completely	Rarely	Mild	1	16	17	No	No	14	14	28
114	Never	Never	Never	Never	Never	0	Yes	Public insurance	29	Female	Some college or 2-year degree	NOT Hispanic or Latino	1	Very Good	Very Good	Very Good	Very Good	Very Good	Very Good	Completely	Rarely	Moderate	0	16	17	No	No	16	15	31
116	Never	Never	Never	Never	Never	0	Yes	Employer-sponsored plan	38	Male	4 year college graduate		1	Very Good	Very Good	Good	Excellent	Poor	Excellent	Moderately	Sometimes	Moderate	8	12	11	No	No	13	14	27
117	Hardly ever	Hardly ever	Never	Never	Never	2	Yes	Self-purchased private plan	49	Male	More than 4-year college degree	NOT Hispanic or Latino	1	Good	Very Good	Good	Excellent	Good	Very Good	Completely	Never	Moderate	0	17	16	No	No	14	14	28
118	Hardly ever	Hardly ever	Hardly ever	Never	Never	3	Yes	Employer-sponsored plan	39	Female	More than 4-year college degree	NOT Hispanic or Latino	1	Very Good	Very Good	Very Good	Very Good	Good	Very Good	Completely	Rarely	Mild	8	15	15	No	No	13	14	27
119	Never	Never	Never	Never	Never	0	Yes	Employer-sponsored plan	46	Female	4 year college graduate	NOT Hispanic or Latino	1	Very Good	Very Good	Good	Good	Very Good	Very Good	Completely	Rarely	Moderate	2	15	15	No	No	14	14	28
120	Hardly ever	Hardly ever	Hardly ever	Never	Hardly ever	4	Yes	Employer-sponsored plan	18	Female	High school graduate or GED	NOT Hispanic or Latino	1	Very Good	Very Good	Very Good	Very Good	Very Good	Very Good	Completely	Never	None	2	17	18	No	No	12	14	26
121	Never	Never	Never	Never	Never	0	Yes	Employer-sponsored plan	42	Female	4 year college graduate	NOT Hispanic or Latino	1	Excellent	Excellent	Excellent	Good	Very Good	Very Good	Completely	Never	None	2	17	19	No	No	14	14	28
122	Hardly ever	Hardly ever	Never	Never	Never	2	Yes	Employer-sponsored plan	42	Female	More than 4-year college degree	NOT Hispanic or Latino	1	Very Good	Very Good	Very Good	Very Good	Very Good	Very Good	Completely	Never	Mild	0	17	18	No	No	14	14	28
123	Fairly often	Occasionally	Never	Never	Never	5	Yes	Dont know/Other	21	Male	High school graduate or GED	NOT Hispanic or Latino	1	Very Good	Excellent	Good	Excellent	Excellent	Very Good	Completely	Often	Mild	1	18	16	No	No	15	15	30
124	Occasionally	Occasionally	Occasionally	Occasionally	Occasionally	10	Yes	Employer-sponsored plan	29	Female	4 year college graduate		1	Good	Good	Good	Good	Good	Good	A little	Sometimes	Mild	0	11	14	No	No	13	14	27
127	Hardly ever	Never	Hardly ever	Hardly ever	Never	3	Yes	Self-purchased private plan	68	Female	Some college or 2-year degree	NOT Hispanic or Latino	1	Very Good	Very Good	Very Good	Very Good	Very Good	Very Good	Completely	Never	None	0	17	19	No	No	13	13	26
129	Hardly ever	Hardly ever	Hardly ever	Never	Hardly ever	4	Yes	Employer-sponsored plan	50	Male	More than 4-year college degree	NOT Hispanic or Latino	1	Very Good	Excellent	Very Good	Excellent	Excellent	Excellent	Completely	Never	None	0	20	19	No	No	14	14	28
131	Occasionally	Hardly ever	Hardly ever	Never	Never	4	No		63	Female	4 year college graduate	NOT Hispanic or Latino	1	Very Good	Excellent	Very Good	Very Good	Very Good	Very Good	Completely	Rarely	Mild	0	17	18	No	No	14	13	27
132	Never	Never	Never	Never	Never	0	Yes	Employer-sponsored plan	54	Female	Some college or 2-year degree		1	Very Good	Very Good	Very Good	Very Good	Very Good	Very Good	Completely	Never	None	0	17	19	No	No	14	14	28
133	Never	Occasionally	Occasionally	Never	Never	4	Yes	Employer-sponsored plan	25	Female	4 year college graduate	NOT Hispanic or Latino	1	Very Good	Very Good	Good	Good	Good	Fair	Completely	Always	Moderate	0	11	16	No	No	16	14	30
134	Never	Never	Never	Never	Never	0	Yes	Employer-sponsored plan	63	Female	4 year college graduate	NOT Hispanic or Latino	1	Very Good	Excellent	Very Good	Very Good	Good	Excellent	Completely	Sometimes	Mild	5	14	16	No	No	14	13	27
136	Never	Never	Never	Never	Never	0	Yes	Employer-sponsored plan	30	Male	4 year college graduate	NOT Hispanic or Latino	1	Very Good	Very Good	Very Good	Very Good	Very Good	Very Good	A little	Rarely	Mild	1	16	14	No	No	14	14	28
137	Never	Hardly ever	Hardly ever	Never	Never	2	Yes	Employer-sponsored plan	29	Female	4 year college graduate	NOT Hispanic or Latino	1	Very Good	Very Good	Very Good	Very Good	Very Good	Very Good	Completely	Never	Mild	1	17	17	No	No	16	16	32
138	Very often	Occasionally	Very often	Occasionally	Hardly ever	13	Yes	Employer-sponsored plan	45	Female	High school graduate or GED	NOT Hispanic or Latino	1	Fair	Fair	Poor	Poor	Good	Fair	Moderately	Often	Very Severe	7	9	7	No	No	12	10	22
139	Never	Never	Never	Never	Never	0	Yes	Employer-sponsored plan	40	Female	4 year college graduate	NOT Hispanic or Latino	1	Very Good	Excellent	Very Good	Excellent	Excellent	Excellent	Completely	Never	None	0	20	19	No	No	14	14	28
140	Never	Never	Hardly ever	Never	Never	1	No		31	Female	More than 4-year college degree	Hispanic or Latino	2	Very Good	Very Good	Very Good	Very Good	Very Good	Excellent	Completely	Never	None	0	17	19	No	No	14	14	28
141	Never	Never	Never	Never	Never	0	Yes	Dont know/Other	61	Female	Some college or 2-year degree	NOT Hispanic or Latino	1	Good	Good	Good	Good	Good	Good	Completely	Never	None	0	14	18	No	No	16	16	32
142	Never	Never	Never	Never	Never	0	Yes	Employer-sponsored plan	35	Female	Some college or 2-year degree	NOT Hispanic or Latino	1	Excellent	Excellent	Very Good	Very Good	Excellent	Excellent	Completely	Never	Mild	5	19	16	No	No	13	14	27
143	Never	Never	Never	Never	Never	0	Yes	Employer-sponsored plan	67	Female	Some college or 2-year degree	NOT Hispanic or Latino	1	Excellent	Very Good	Good	Good	Very Good	Very Good	Mostly	Sometimes	Moderate	7	13	12	No	No	12	13	25
144	Never	Never	Hardly ever	Never	Never	1	Yes	Employer-sponsored plan	65	Female	4 year college graduate	NOT Hispanic or Latino	1	Excellent	Excellent	Excellent	Very Good	Excellent	Excellent	Completely	Rarely	None	3	18	19	No	No	12	14	26
145	Hardly ever	Hardly ever	Hardly ever	Hardly ever	Occasionally	6	Yes	Employer-sponsored plan	39	Male	More than 4-year college degree	NOT Hispanic or Latino	1	Very Good	Very Good	Good	Good	Good	Excellent	Completely	Rarely	Mild	0	14	17	No	No	14	14	28
146	Hardly ever	Never	Hardly ever	Hardly ever	Never	3	Yes	Employer-sponsored plan	68	Female	4 year college graduate	NOT Hispanic or Latino	1	Very Good	Very Good	Very Good	Excellent	Very Good	Very Good	Mostly	Never	Moderate	5	18	14	No	No	14	14	28
147	Never	Never	Never	Never	Never	0	Yes	Self-purchased private plan	79	Male	More than 4-year college degree	NOT Hispanic or Latino	1	Excellent	Excellent	Excellent	Excellent	Excellent	Very Good	Completely	Never	None	0	20	20	No	No	12	13	25
148	Never	Occasionally	Hardly ever	Never	Never	3	Yes	Employer-sponsored plan	61	Female	More than 4-year college degree	NOT Hispanic or Latino	1	Very Good	Excellent	Very Good	Very Good	Very Good	Excellent	Completely	Rarely	Mild	2	17	17	No	No	14	13	27
149	Never	Hardly ever	Hardly ever	Never	Never	2	Don't know/Not sure		80	Female	4 year college graduate	NOT Hispanic or Latino	1	Excellent	Excellent	Excellent	Very Good	Very Good	Excellent	Completely	Never	Mild	5	18	17	No	No	14	14	28
150	Occasionally	Occasionally	Very often	Never	Never	8	Yes	Employer-sponsored plan	41	Female	More than 4-year college degree	NOT Hispanic or Latino	1	Very Good	Excellent	Very Good	Very Good	Very Good	Good	Completely	Sometimes	Moderate	2	15	16	No	No	14	14	28
151	Very often	Very often	Very often	Very often	Very often	20	Yes	Self-purchased private plan	80	Female	More than 4-year college degree		1	Good	Good	Good	Very Good	Good	Good	Mostly	Rarely	Moderate	5	14	13	No	No	14	12	26
152	Never	Never	Never	Never	Never	0	Yes	Employer-sponsored plan	51	Female	4 year college graduate	NOT Hispanic or Latino	1	Very Good	Very Good	Very Good	Very Good	Very Good	Very Good	Moderately	Sometimes	None	8	14	14	No	No	14	14	28
153	Never	Never	Never	Never	Never	0	Yes	Employer-sponsored plan	22	Female	4 year college graduate		1	Good	Very Good	Very Good	Very Good	Very Good	Very Good	Moderately	Never	Mild	0	17	16	No	No	14	14	28
154	Never	Never	Never	Never	Never	0	Yes	Employer-sponsored plan	41	Female	More than 4-year college degree	NOT Hispanic or Latino	1	Very Good	Very Good	Good	Good	Excellent	Very Good	Completely	Rarely	Moderate	1	16	15	No	No	14	14	28
155	Never	Occasionally	Hardly ever	Never	Never	3	Yes	Employer-sponsored plan	24	Male	More than 4-year college degree	NOT Hispanic or Latino	1	Good	Very Good	Good	Very Good	Very Good	Very Good	Completely	Never	None	0	17	18	No	No	14	14	28
156	Never	Never	Never	Never	Never	0	Yes	Employer-sponsored plan	26	Female	Some college or 2-year degree	NOT Hispanic or Latino	1	Very Good	Excellent	Good	Very Good	Excellent	Very Good	Completely	Rarely	None	1	18	17	No	No	14	14	28
157	Hardly ever	Never	Hardly ever	Never	Never	2	Yes	Employer-sponsored plan	33	Female	4 year college graduate	NOT Hispanic or Latino	1	Very Good	Excellent	Very Good	Very Good	Excellent	Excellent	Completely	Rarely	None	1	18	18	No	No	14	14	28
158	Never	Never	Never	Never	Never	0	Yes	Employer-sponsored plan	34	Male	More than 4-year college degree	NOT Hispanic or Latino	1	Very Good	Very Good	Good	Very Good	Excellent	Very Good	Completely	Sometimes	Mild	2	15	16	No	No	14	14	28
159	Never	Never	Never	Never	Never	0	Yes	Employer-sponsored plan	42	Female	More than 4-year college degree	NOT Hispanic or Latino	1	Very Good	Very Good	Very Good	Very Good	Very Good	Very Good	Completely	Never	Mild	2	17	17	No	No	16	16	32
160	Never	Never	Never	Never	Never	0	Yes	Employer-sponsored plan	44	Female	More than 4-year college degree	NOT Hispanic or Latino	1	Very Good	Very Good	Very Good	Very Good	Very Good	Very Good	Completely	Sometimes	Mild	2	14	17	No	No	14	14	28
161	Hardly ever	Occasionally	Never	Never	Never	3	Yes	Employer-sponsored plan	60	Female	4 year college graduate	NOT Hispanic or Latino	1	Excellent	Excellent	Excellent	Excellent	Excellent	Excellent	Completely	Rarely	Mild	1	19	18	No	No	14	14	28
162	Occasionally	Occasionally	Never	Never	Hardly ever	5	Yes	Employer-sponsored plan	20	Female	Some college or 2-year degree	NOT Hispanic or Latino	1	Very Good	Excellent	Very Good	Very Good	Very Good	Excellent	Completely	Sometimes	Mild	2	15	17	No	No	14	14	28
163	Never	Never	Never	Never	Never	0	Yes	Public insurance	63	Male	Some college or 2-year degree		1	Excellent	Excellent	Very Good	Excellent	Excellent	Excellent	Completely	Never	None	0	20	19	No	No	14	14	28
164	Occasionally	Hardly ever	Hardly ever	Hardly ever	Never	5	Yes	Self-purchased private plan	70	Female	More than 4-year college degree	NOT Hispanic or Latino	1	Excellent	Excellent	Very Good	Excellent	Excellent	Excellent	Completely	Never	Mild	1	20	17	No	No	14	14	28
165	Never	Never	Never	Never	Never	0	Yes	Employer-sponsored plan	44	Female	4 year college graduate	NOT Hispanic or Latino	1	Excellent	Excellent	Excellent	Excellent	Excellent	Excellent	Completely	Never	None	5	20	18	No	No	12	12	24
166	Occasionally	Hardly ever	Never	Never	Never	3	Yes	Employer-sponsored plan	42	Female	More than 4-year college degree	NOT Hispanic or Latino	1	Very Good	Very Good	Very Good	Very Good	Very Good	Very Good	Completely	Rarely	Mild	2	16	17	No	No	14	14	28
167	Occasionally	Occasionally	Never	Hardly ever	Hardly ever	6	No		68	Male	4 year college graduate	NOT Hispanic or Latino	2	Good	Good	Good	Good	Good	Good	Mostly	Rarely	Mild	4	13	14	No	No	14	14	28
168	Hardly ever	Hardly ever	Very often	Never	Never	6	Yes	Employer-sponsored plan	55	Female	More than 4-year college degree	NOT Hispanic or Latino	1	Good	Excellent	Good	Excellent	Excellent	Excellent	Mostly	Never	Mild	1	20	15	No	No	12	14	26
169	Never	Never	Never	Never	Never	0	Yes	Public insurance	51	Female	More than 4-year college degree	NOT Hispanic or Latino	1	Very Good	Very Good	Very Good	Very Good	Very Good	Very Good	Completely	Rarely	Mild	1	16	17	No	No	16	16	32
170	Never	Never	Occasionally	Never	Never	2	Yes	Employer-sponsored plan	20	Female	Some college or 2-year degree	NOT Hispanic or Latino	1	Very Good	Very Good	Very Good	Very Good	Very Good	Very Good	Completely	Often	Mild	1	15	17	No	No	14	14	28
171	Never	Never	Occasionally	Never	Never	2	Yes	Employer-sponsored plan	21	Male	4 year college graduate	NOT Hispanic or Latino	1	Good	Fair	Fair	Good	Poor	Poor	Completely	Never	Mild	0	11	16	No	No	14	14	28
172	Fairly often	Very often	Never	Never	Never	7	Yes	Employer-sponsored plan	20	Female	Some college or 2-year degree	NOT Hispanic or Latino	1	Very Good	Excellent	Very Good	Very Good	Very Good	Excellent	Completely	Always	Moderate	1	14	16	No	No	14	14	28
173	Never	Hardly ever	Occasionally	Never	Never	3	Yes	Employer-sponsored plan	77	Female	More than 4-year college degree	NOT Hispanic or Latino	1	Very Good	Very Good	Very Good	Very Good	Very Good	Very Good	Mostly	Never	Mild	7	17	14	No	No	14	14	28
174	Never	Never	Never	Never	Never	0	Yes	Employer-sponsored plan	47	Female	More than 4-year college degree		1	Excellent	Excellent	Excellent	Excellent	Excellent	Excellent	Completely	Never	None	1	20	19	No	No	14	14	28
175	Never	Never	Never	Never	Never	0	Yes	Employer-sponsored plan	21	Female	Some college or 2-year degree	NOT Hispanic or Latino	1	Excellent	Excellent	Excellent	Very Good	Excellent	Excellent	Completely	Never	None	0	19	20	No	No	14	14	28
176	Hardly ever	Never	Hardly ever	Never	Never	2	Yes	Employer-sponsored plan	59	Female	More than 4-year college degree	NOT Hispanic or Latino	1	Very Good	Very Good	Very Good	Very Good	Very Good	Very Good	Mostly	Never	Mild	3	17	16	No	No	12	12	24
177	Hardly ever	Hardly ever	Occasionally	Hardly ever	Never	5	Yes	Employer-sponsored plan	59	Female	Some college or 2-year degree	NOT Hispanic or Latino	1	Good	Very Good	Good	Very Good	Very Good	Very Good	Mostly	Often	Severe	5	15	12	No	No	14	14	28
178	Occasionally	Hardly ever	Occasionally	Hardly ever	Hardly ever	7	Yes	Employer-sponsored plan	65	Male	4 year college graduate	NOT Hispanic or Latino	1	Very Good	Very Good	Very Good	Good	Fair	Good	Completely	Rarely	Moderate	1	13	16	No	No	12	14	26
179	Never	Never	Occasionally	Never	Never	2	Yes	Employer-sponsored plan	34	Female	4 year college graduate	NOT Hispanic or Latino	1	Good	Good	Fair	Good	Fair	Very Good	Completely	Always	Moderate	2	9	14	No	No	14	14	28
180	Never	Never	Never	Never	Never	0	Yes	Employer-sponsored plan	26	Female	More than 4-year college degree		1	Very Good	Very Good	Good	Very Good	Very Good	Very Good	Mostly	Rarely	Mild	0	16	16	No	No	16	16	32
181	Hardly ever	Occasionally	Never	Hardly ever	Never	4	Yes	Employer-sponsored plan	53	Female	More than 4-year college degree	NOT Hispanic or Latino	1	Very Good	Excellent	Very Good	Excellent	Excellent	Excellent	Completely	Never	Mild	1	20	17	No	No	10	10	20
182	Occasionally	Never	Never	Never	Never	2	Yes	Dont know/Other	72	Female	4 year college graduate	NOT Hispanic or Latino	1	Very Good	Very Good	Very Good	Very Good	Very Good	Very Good	Completely	Never	Mild	5	17	16	No	No	14	14	28
183	Very often	Very often	Hardly ever	Hardly ever	Hardly ever	11	Yes	Employer-sponsored plan	44	Female	More than 4-year college degree	NOT Hispanic or Latino	1	Good	Good	Good	Good	Good	Good	Mostly	Sometimes	Moderate	7	11	12	No	No	14	14	28
185	Occasionally	Occasionally	Occasionally	Hardly ever	Hardly ever	8	No		20	Male	High school graduate or GED	NOT Hispanic or Latino	1	Fair	Fair	Fair	Fair	Fair	Fair	Completely	Rarely	Mild	5	10	14	Yes	No	14	14	28
186	Hardly ever	Hardly ever	Never	Never	Hardly ever	3	Yes	Employer-sponsored plan	29	Female	4 year college graduate	NOT Hispanic or Latino	1	Excellent	Very Good	Very Good	Very Good	Very Good	Very Good	Completely	Often	Mild	0	15	18	No	No	14	14	28
188	Never	Never	Never	Never	Never	0	Yes	Employer-sponsored plan	32	Female	4 year college graduate	NOT Hispanic or Latino	1	Very Good	Very Good	Good	Good	Good	Good	Completely	Never	Mild	1	15	16	No	No	14	14	28
189	Hardly ever	Occasionally	Occasionally	Occasionally	Occasionally	9	Yes	Employer-sponsored plan	41	Male	Some college or 2-year degree		1	Good	Good	Good	Good	Good	Good	Completely	Rarely	Mild	0	13	17	No	No	14	13	27
190	Occasionally	Occasionally	Occasionally	Hardly ever	Hardly ever	8	Yes	Employer-sponsored plan	35	Female	Some college or 2-year degree	NOT Hispanic or Latino	2	Fair	Fair	Fair	Fair	Fair	Fair	Mostly	Often	Moderate	5	9	12	No	No	14	14	28
191	Occasionally	Never	Hardly ever	Never	Never	3	Yes	Employer-sponsored plan	38	Female	4 year college graduate	NOT Hispanic or Latino	1	Very Good	Very Good	Very Good	Fair	Very Good	Excellent	Completely	Sometimes	Moderate	6	12	15	No	No	12	12	24
192	Never	Hardly ever	Hardly ever	Never	Never	2	Yes	Employer-sponsored plan	48	Female	4 year college graduate	NOT Hispanic or Latino	1	Good	Very Good	Good	Very Good	Very Good	Very Good	Completely	Never	Mild	1	17	16	No	No	14	14	28
193	Occasionally	Hardly ever	Never	Never	Never	3	No		81	Female	4 year college graduate		1	Very Good	Excellent	Very Good	Very Good	Very Good	Excellent	Mostly	Never	None	1	18	17	No	No	13	13	26
194	Never	Never	Very often	Never	Never	4	Yes	Employer-sponsored plan	28	Female	More than 4-year college degree	NOT Hispanic or Latino	1	Good	Good	Good	Fair	Fair	Good	Mostly	Always	Moderate	5	8	13	No	No	14	14	28
195	Very often	Hardly ever	Occasionally	Never	Occasionally	9	Yes	Employer-sponsored plan	38	Female	4 year college graduate	NOT Hispanic or Latino	1	Very Good	Very Good	Good	Fair	Very Good	Very Good	Moderately	Always	Moderate	5	11	12	No	No	14	14	28
196	Hardly ever	Hardly ever	Occasionally	Never	Never	4	Yes	Employer-sponsored plan	39	Male	More than 4-year college degree	NOT Hispanic or Latino	1	Very Good	Very Good	Very Good	Very Good	Very Good	Very Good	Mostly	Rarely	Moderate	3	16	15	No	No	14	12	26
197	Never	Never	Never	Never	Never	0	Yes	Employer-sponsored plan	39	Female	More than 4-year college degree	NOT Hispanic or Latino	1	Excellent	Excellent	Excellent	Excellent	Excellent	Excellent	Completely	Never	Mild	0	20	19	No	No	14	14	28
198	Occasionally	Occasionally	Never	Never	Hardly ever	5	Yes	Employer-sponsored plan	41	Female	More than 4-year college degree	NOT Hispanic or Latino	1	Good	Good	Good	Fair	Very Good	Very Good	Mostly	Rarely	Moderate	4	13	13	No	No	14	14	28
199	Hardly ever	Hardly ever	Hardly ever	Hardly ever	Never	4	Yes	Employer-sponsored plan	43	Female	More than 4-year college degree	NOT Hispanic or Latino	1	Very Good	Good	Very Good	Fair	Good	Good	Completely	Sometimes	Moderate	3	10	16	No	No	14	14	28
200	Hardly ever	Hardly ever	Hardly ever	Never	Never	3	Yes	Self-purchased private plan	69	Male	4 year college graduate	NOT Hispanic or Latino	1	Fair	Good	Fair	Good	Very Good	Good	Moderately	Rarely	Moderate	3	14	12	No	No	13	14	27
201	Never	Hardly ever	Hardly ever	Never	Never	2	Yes	Employer-sponsored plan	42	Female	Some college or 2-year degree	NOT Hispanic or Latino	1	Good	Excellent	Very Good	Excellent	Excellent	Excellent	Completely	Never	Mild	6	20	16	No	No	14	14	28
202	Never	Occasionally	Hardly ever	Never	Never	3	No		74	Female	High school graduate or GED	NOT Hispanic or Latino	1	Good	Very Good	Good	Very Good	Very Good	Very Good	Mostly	Never	Mild	7	17	13	No	No	14	13	27
203	Never	Hardly ever	Occasionally	Occasionally	Never	5	Yes	Employer-sponsored plan	61	Female	More than 4-year college degree	NOT Hispanic or Latino	1	Good	Good	Good	Good	Good	Good	Completely	Never	None	2	14	17	No	No	13	14	27
204	Hardly ever	Hardly ever	Hardly ever	Never	Never	3	Yes	Employer-sponsored plan	74	Male	More than 4-year college degree		1	Very Good	Excellent	Very Good	Excellent	Good	Good	Mostly	Never	None	5	18	16	No	No	10	13	23
205	Never	Never	Never	Never	Never	0	Yes	Employer-sponsored plan	27	Female	More than 4-year college degree	NOT Hispanic or Latino	1	Good	Good	Good	Good	Good	Good	Completely	Rarely	Moderate	0	13	16	No	No	14	14	28
206	Hardly ever	Never	Hardly ever	Never	Never	2	Yes	Employer-sponsored plan	48	Female	More than 4-year college degree	NOT Hispanic or Latino	1	Very Good	Very Good	Very Good	Good	Very Good	Very Good	Completely	Rarely	Mild	2	15	17	No	No	16	16	32
207	Never	Never	Never	Never	Never	0	Yes	Public insurance	63	Female	More than 4-year college degree	NOT Hispanic or Latino	2	Fair	Fair	Fair	Fair	Fair	Very Good	Completely	Sometimes	Mild	0	8	16	No	No	9	14	23
208	Hardly ever	Hardly ever	Hardly ever	Never	Never	3	No		76	Female	Some college or 2-year degree	NOT Hispanic or Latino	1	Fair	Fair	Fair	Good	Good	Very Good	Moderately	Never	Mild	5	13	12	Yes	Yes	0	0	0
209	Never	Never	Never	Never	Never	0	Yes	Employer-sponsored plan	18	Male	Some high school but did not graduate	NOT Hispanic or Latino	1	Very Good	Very Good	Very Good	Very Good	Excellent	Excellent	Completely	Never	None	0	18	19	No	No	14	14	28
210	Never	Hardly ever	Hardly ever	Never	Never	2	Yes	Employer-sponsored plan	41	Male	More than 4-year college degree	NOT Hispanic or Latino	1	Excellent	Excellent	Excellent	Good	Very Good	Very Good	Completely	Sometimes	Moderate	0	14	18	No	No	16	16	32
211	Never	Never	Never	Never	Never	0	Yes	Employer-sponsored plan	56	Female	More than 4-year college degree	NOT Hispanic or Latino	1	Very Good	Excellent	Very Good	Excellent	Excellent	Excellent	Completely	Never	None	5	20	17	No	No	14	14	28
212	Hardly ever	Hardly ever	Hardly ever	Never	Never	3	Yes	Employer-sponsored plan	59	Female	Some college or 2-year degree	NOT Hispanic or Latino	1	Very Good	Very Good	Very Good	Very Good	Very Good	Very Good	Completely	Never	Mild	0	17	18	No	No	12	12	24
213	Fairly often	Hardly ever	Hardly ever	Hardly ever	Hardly ever	7	Don't know/Not sure		26	Female	More than 4-year college degree	NOT Hispanic or Latino	2	Good	Good	Good	Good	Good	Good	A little	Rarely	Mild	5	13	12	No	No	14	14	28
214	Hardly ever	Hardly ever	Hardly ever	Hardly ever	Never	4	Yes	Employer-sponsored plan	54	Female	More than 4-year college degree	NOT Hispanic or Latino	1	Excellent	Excellent	Excellent	Excellent	Excellent	Excellent	Completely	Rarely	Mild	0	19	19	No	No	14	14	28
215	Occasionally	Occasionally	Hardly ever	Never	Never	5	No		71	Female	4 year college graduate	NOT Hispanic or Latino	1	Very Good	Very Good	Good	Excellent	Very Good	Excellent	Completely	Never	Mild	0	18	17	No	No	16	14	30
216	Never	Never	Hardly ever	Never	Never	1	Yes	Employer-sponsored plan	26	Female	4 year college graduate	NOT Hispanic or Latino	1	Good	Very Good	Very Good	Good	Good	Very Good	Completely	Rarely	Mild	0	14	18	No	No	14	14	28
217	Occasionally	Occasionally	Occasionally	Never	Never	6	Yes	Public insurance	66	Female	More than 4-year college degree	NOT Hispanic or Latino	2	Good	Very Good	Good	Very Good	Good	Excellent	Completely	Rarely	None	1	15	17	No	No	14	14	28
219	Hardly ever	Hardly ever	Never	Never	Never	2	Yes	Employer-sponsored plan	54	Female	4 year college graduate	NOT Hispanic or Latino	1	Good	Very Good	Good	Very Good	Very Good	Very Good	Completely	Never	Mild	2	17	16	No	No	16	16	32
220	Hardly ever	Never	Never	Never	Never	1	Yes	Employer-sponsored plan	60	Female	4 year college graduate	NOT Hispanic or Latino	1	Good	Very Good	Good	Very Good	Very Good	Very Good	Mostly	Never	Mild	5	17	14	No	No	14	14	28
221	Occasionally	Occasionally	Occasionally	Occasionally	Occasionally	10	Yes	Dont know/Other	31	Male	More than 4-year college degree	NOT Hispanic or Latino	2	Good	Good	Good	Good	Good	Good	Moderately	Often	Mild	5	12	13	No	No	3	2	5
222	Hardly ever	Hardly ever	Hardly ever	Hardly ever	Hardly ever	5	Yes	Employer-sponsored plan	34	Female	More than 4-year college degree		2	Fair	Fair	Fair	Fair	Fair	Fair	Mostly	Rarely	Mild	3	10	14	No	No	15	14	29
223	Never	Hardly ever	Never	Hardly ever	Hardly ever	3	Yes	Employer-sponsored plan	27	Male	4 year college graduate	NOT Hispanic or Latino	1	Good	Good	Good	Good	Good	Good	Completely	Rarely	None	0	13	18	No	No	0	0	0
224	Never	Never	Occasionally	Hardly ever	Never	3	Yes	Dont know/Other	20	Female	Some college or 2-year degree	NOT Hispanic or Latino	1	Good	Good	Fair	Fair	Very Good	Good	Completely	Often	Mild	0	12	16	No	No	14	14	28
225	Hardly ever	Fairly often	Never	Never	Never	4	Yes	Public insurance	20	Female	Some college or 2-year degree	NOT Hispanic or Latino	1	Good	Excellent	Good	Good	Excellent	Excellent	Completely	Sometimes	Mild	2	15	16	No	No	14	14	28
226	Never	Never	Never	Never	Never	0	No		35	Male	More than 4-year college degree	NOT Hispanic or Latino	1	Good	Good	Good	Good	Very Good	Good	Completely	Sometimes	Mild	1	12	16	No	No	16	15	31
227	Occasionally	Occasionally	Occasionally	Hardly ever	Hardly ever	8	Yes	Employer-sponsored plan	27	Female	4 year college graduate	NOT Hispanic or Latino	1	Good	Good	Good	Good	Good	Good	Completely	Sometimes	Severe	2	11	14	No	No	14	14	28
228	Never	Never	Never	Never	Never	0	Yes	Employer-sponsored plan	38	Female	More than 4-year college degree	NOT Hispanic or Latino	1	Very Good	Excellent	Very Good	Very Good	Very Good	Excellent	Completely	Rarely	Mild	0	17	18	No	No	14	14	28
229	Never	Never	Never	Never	Never	0	No		50	Female	More than 4-year college degree	NOT Hispanic or Latino	1	Excellent	Excellent	Very Good	Very Good	Very Good	Very Good	Completely	Never	None	0	18	19	No	No	14	14	28
230	Never	Never	Never	Never	Never	0	No		65	Female	4 year college graduate	NOT Hispanic or Latino	1	Excellent	Excellent	Excellent	Excellent	Good	Very Good	Completely	Never	Mild	1	18	18	No	No	14	14	28
232	Hardly ever	Occasionally	Fairly often	Occasionally	Occasionally	10	No		36	Male	4 year college graduate	NOT Hispanic or Latino	1	Fair	Good	Good	Good	Good	Good	Completely	Rarely	Mild	2	13	16	No	No	14	14	28
233	Fairly often	Occasionally	Fairly often	Occasionally	Hardly ever	11	Yes	Employer-sponsored plan	54	Female	More than 4-year college degree		1	Fair	Good	Good	Good	Very Good	Good	Moderately	Sometimes	Moderate	6	12	12	No	No	14	14	28
234	Hardly ever	Hardly ever	Occasionally	Hardly ever	Hardly ever	6	Yes	Employer-sponsored plan	47	Male	Some college or 2-year degree		2	Very Good	Very Good	Very Good	Very Good	Good	Very Good	Mostly	Never	None	6	16	16	No	No	14	14	28
235	Hardly ever	Hardly ever	Never	Never	Never	2	Yes	Employer-sponsored plan	25	Female	4 year college graduate	NOT Hispanic or Latino	1	Excellent	Excellent	Excellent	Excellent	Excellent	Excellent	Completely	Never	None	0	20	20	No	No	14	14	28
236	Occasionally	Hardly ever	Fairly often	Hardly ever	Never	7	Yes	Employer-sponsored plan	25	Male	More than 4-year college degree	NOT Hispanic or Latino	1	Very Good	Very Good	Excellent	Good	Good	Very Good	Mostly	Often	Moderate	0	13	17	No	No	14	14	28
237	Never	Never	Never	Never	Never	0	Yes	Employer-sponsored plan	22	Female	4 year college graduate	NOT Hispanic or Latino	1	Excellent	Excellent	Excellent	Very Good	Very Good	Very Good	Mostly	Rarely	Mild	0	17	18	No	No	14	14	28
238	Hardly ever	Occasionally	Occasionally	Never	Hardly ever	6	Yes	Employer-sponsored plan	58	Male	4 year college graduate	NOT Hispanic or Latino	1	Good	Good	Good	Fair	Good	Good	Mostly	Rarely	Mild	5	12	14	No	No	15	15	30
239	Hardly ever	Never	Occasionally	Never	Never	3	Yes	Employer-sponsored plan	47	Female	More than 4-year college degree	NOT Hispanic or Latino	2	Excellent	Excellent	Excellent	Very Good	Very Good	Very Good	Completely	Rarely	Mild	1	17	18	No	No	13	14	27
240	Never	Never	Never	Never	Never	0	No		60	Female	More than 4-year college degree	NOT Hispanic or Latino	1	Excellent	Excellent	Excellent	Excellent	Excellent	Excellent	Completely	Never	None	0	20	20	No	No	14	14	28
241	Occasionally	Occasionally	Hardly ever	Never	Never	5	No		22	Female	More than 4-year college degree	Hispanic or Latino	1	Very Good	Very Good	Very Good	Very Good	Very Good	Very Good	Completely	Sometimes	Moderate	2	14	16	No	No	14	14	28
242	Never	Hardly ever	Never	Never	Never	1	Don't know/Not sure		19	Male	Some college or 2-year degree	Hispanic or Latino	1	Good	Very Good	Good	Fair	Very Good	Very Good	Completely	Often	None	0	13	18	No	No	14	14	28
243	Never	Never	Never	Never	Never	0	Yes	Employer-sponsored plan	49	Female	Some college or 2-year degree	NOT Hispanic or Latino	1	Excellent	Excellent	Excellent	Excellent	Excellent	Excellent	Completely	Never	None	2	20	19	No	No	14	13	27
244	Occasionally	Occasionally	Fairly often	Hardly ever	Hardly ever	9	Yes	Employer-sponsored plan	54	Female	4 year college graduate	NOT Hispanic or Latino	1	Very Good	Very Good	Good	Very Good	Very Good	Very Good	Completely	Never	Mild	2	17	16	No	No	14	13	27
245	Occasionally	Very often	Occasionally	Occasionally	Fairly often	13	Yes	Employer-sponsored plan	37	Female	More than 4-year college degree	NOT Hispanic or Latino	1	Fair	Good	Very Good	Fair	Fair	Very Good	Completely	Often	Moderate	2	10	16	No	No	16	16	32
246	Hardly ever	Hardly ever	Occasionally	Never	Never	4	Yes	Employer-sponsored plan	24	Female	More than 4-year college degree	NOT Hispanic or Latino	1	Good	Good	Good	Fair	Good	Good	Mostly	Sometimes	Moderate	2	10	14	No	No	14	14	28
247	Never	Never	Hardly ever	Never	Never	1	No		74	Female	Some college or 2-year degree	NOT Hispanic or Latino	1	Excellent	Excellent	Excellent	Excellent	Excellent	Excellent	Completely	Never	None	1	20	19	No	No	14	14	28
248	Hardly ever	Hardly ever	Hardly ever	Occasionally	Never	5	Yes	Employer-sponsored plan	54	Female	Some college or 2-year degree	Hispanic or Latino	2	Good	Good	Good	Good	Good	Good	Completely	Sometimes	Mild	3	11	16	No	No	14	14	28
249	Hardly ever	Hardly ever	Hardly ever	Never	Never	3	Yes	Employer-sponsored plan	56	Male	4 year college graduate	NOT Hispanic or Latino	1	Good	Good	Good	Good	Good	Good	Mostly	Rarely	Moderate	4	13	13	No	No	14	14	28
250	Never	Never	Never	Never	Never	0	No		81	Male	High school graduate or GED		1	Excellent	Excellent	Excellent	Excellent	Excellent	Excellent	Completely	Never	None	0	20	20	No	No	14	14	28
251	Never	Never	Never	Never	Never	0	Yes	Employer-sponsored plan	40	Female	4 year college graduate	NOT Hispanic or Latino	1	Good	Good	Good	Good	Good	Good	Completely	Rarely	Mild	2	13	16	No	No	14	14	28
252	Occasionally	Hardly ever	Occasionally	Never	Hardly ever	6	Yes	Employer-sponsored plan	54	Male	More than 4-year college degree		1	Excellent	Excellent	Excellent	Excellent	Very Good	Excellent	Completely	Rarely	Mild	0	18	19	No	No	14	14	28
253	Never	Never	Never	Never	Never	0	Yes	Employer-sponsored plan	23	Female	4 year college graduate	NOT Hispanic or Latino	1	Excellent	Excellent	Excellent	Excellent	Excellent	Excellent	Completely	Rarely	Mild	1	19	18	No	No	14	14	28
254	Hardly ever	Hardly ever	Fairly often	Hardly ever	Hardly ever	7	Yes	Dont know/Other	24	Male	4 year college graduate	NOT Hispanic or Latino	1	Good	Very Good	Fair	Good	Very Good	Very Good	Mostly	Rarely	Moderate	3	15	13	No	No	16	16	32
255	Never	Never	Never	Never	Never	0	Yes	Employer-sponsored plan	60	Male	More than 4-year college degree		1	Good	Very Good	Good	Good	Good	Good	Completely	Rarely	None	5	14	16	No	No	14	14	28
256	Occasionally	Hardly ever	Fairly often	Hardly ever	Hardly ever	8	Yes	Employer-sponsored plan	22	Female	4 year college graduate	NOT Hispanic or Latino	1	Good	Excellent	Very Good	Very Good	Very Good	Very Good	Completely	Never	None	0	18	19	No	No	14	14	28
257	Hardly ever	Hardly ever	Never	Never	Never	2	Yes	Employer-sponsored plan	49	Female	4 year college graduate	NOT Hispanic or Latino	2	Good	Very Good	Good	Excellent	Excellent	Excellent	Completely	Never	Mild	3	19	16	No	No	14	14	28
259	Never	Never	Never	Never	Never	0	Yes	Employer-sponsored plan	46	Female	More than 4-year college degree	NOT Hispanic or Latino	1	Excellent	Excellent	Excellent	Excellent	Excellent	Excellent	Completely	Never	None	0	20	20	No	No	14	14	28
260	Never	Hardly ever	Never	Never	Never	1	Yes	Employer-sponsored plan	20	Female	4 year college graduate	NOT Hispanic or Latino	1	Excellent	Excellent	Excellent	Excellent	Excellent	Excellent	Completely	Rarely	Mild	0	19	19	No	No	14	14	28
261	Never	Never	Never	Never	Never	0	Yes	Employer-sponsored plan	28	Male	4 year college graduate	NOT Hispanic or Latino	1	Excellent	Excellent	Very Good	Good	Excellent	Excellent	Completely	Sometimes	Mild	0	15	18	No	No	14	14	28
262	Hardly ever	Occasionally	Occasionally	Never	Hardly ever	6	Yes	Self-purchased private plan	67	Male	4 year college graduate	NOT Hispanic or Latino	1	Good	Excellent	Good	Very Good	Excellent	Excellent	Completely	Never	None	7	19	15	No	No	14	14	28
263	Occasionally	Occasionally	Hardly ever	Never	Never	5	Yes	Employer-sponsored plan	59	Female	4 year college graduate	NOT Hispanic or Latino	1	Very Good	Very Good	Very Good	Very Good	Very Good	Very Good	Completely	Rarely	None	0	16	19	No	No	13	14	27
264	Occasionally	Hardly ever	Hardly ever	Never	Never	4	Yes	Self-purchased private plan	66	Female	4 year college graduate	NOT Hispanic or Latino	1	Excellent	Excellent	Excellent	Excellent	Excellent	Excellent	Completely	Rarely	Mild	1	19	18	No	No	14	14	28
265	Never	Never	Hardly ever	Never	Never	1	Yes	Employer-sponsored plan	71	Male	4 year college graduate	NOT Hispanic or Latino	2	Good	Good	Good	Good	Good	Good	Completely	Never	None	0	14	18	No	No	13	14	27
266	Hardly ever	Hardly ever	Hardly ever	Never	Hardly ever	4	Yes	Employer-sponsored plan	39	Male	More than 4-year college degree	NOT Hispanic or Latino	1	Very Good	Very Good	Very Good	Very Good	Good	Very Good	Completely	Rarely	Mild	7	15	15	No	No	14	14	28
267	Never	Never	Never	Never	Never	0	No		48	Female	4 year college graduate	NOT Hispanic or Latino	1	Good	Very Good	Good	Excellent	Excellent	Excellent	Mostly	Never	None	5	19	15	No	No	14	14	28
268	Never	Never	Fairly often	Never	Never	3	Don't know/Not sure		56	Male	More than 4-year college degree	NOT Hispanic or Latino	2	Poor	Excellent	Fair	Good	Excellent	Poor	Completely	Never	Moderate	1	18	14	No	No	14	16	30
269	Hardly ever	Hardly ever	Occasionally	Occasionally	Never	6	Yes	Employer-sponsored plan	65	Male	Some college or 2-year degree	NOT Hispanic or Latino	1	Good	Good	Fair	Good	Good	Good	Completely	Never	Mild	3	14	15	Yes	No	8	13	21
270	Never	Never	Never	Never	Never	0	Yes	Employer-sponsored plan	62	Male	More than 4-year college degree	NOT Hispanic or Latino	1	Very Good	Excellent	Very Good	Very Good	Very Good	Very Good	Completely	Never	None	0	18	19	No	No	14	14	28
271	Very often	Very often	Occasionally	Hardly ever	Never	11	Yes	Employer-sponsored plan	44	Female	More than 4-year college degree	NOT Hispanic or Latino	1	Good	Good	Good	Good	Good	Good	Completely	Rarely	Moderate	7	13	13	No	No	14	14	28
272	Never	Never	Never	Never	Never	0	Yes	Employer-sponsored plan	51	Female	Some college or 2-year degree	NOT Hispanic or Latino	1	Excellent	Excellent	Excellent	Excellent	Excellent	Excellent	Completely	Never	Mild	1	20	18	No	No	14	14	28
273	Hardly ever	Occasionally	Occasionally	Hardly ever	Occasionally	8	Yes	Employer-sponsored plan	46	Female	More than 4-year college degree	NOT Hispanic or Latino	1	Very Good	Very Good	Very Good	Very Good	Very Good	Very Good	Completely	Rarely	Moderate	6	16	15	No	No	14	14	28
274	Hardly ever	Never	Hardly ever	Never	Never	2	Yes	Employer-sponsored plan	49	Female	More than 4-year college degree	NOT Hispanic or Latino	1	Very Good	Very Good	Excellent	Good	Very Good	Very Good	Completely	Sometimes	Mild	2	13	18	No	No	14	14	28
275	Hardly ever	Hardly ever	Hardly ever	Never	Never	3	Yes	Employer-sponsored plan	48	Female	More than 4-year college degree	NOT Hispanic or Latino	1	Good	Excellent	Good	Very Good	Excellent	Very Good	Mostly	Never	Moderate	4	19	13	No	No	14	14	28
276	Never	Never	Hardly ever	Never	Never	1	Yes	Employer-sponsored plan	54	Male	4 year college graduate	NOT Hispanic or Latino	1	Excellent	Excellent	Excellent	Excellent	Excellent	Excellent	Completely	Rarely	Mild	1	19	18	No	No	14	14	28
277	Never	Never	Occasionally	Never	Never	2	Yes	Employer-sponsored plan	61	Female	More than 4-year college degree	NOT Hispanic or Latino	1	Fair	Excellent	Excellent	Excellent	Excellent	Excellent	Completely	Never	None	5	20	18	No	No	12	12	24
278	Hardly ever	Occasionally	Hardly ever	Occasionally	Never	6	Yes	Employer-sponsored plan	85	Male	Some college or 2-year degree		1	Very Good	Very Good	Very Good	Good	Excellent	Very Good	Mostly	Rarely	Mild	2	16	16	No	No	13	14	27
279	Never	Hardly ever	Hardly ever	Never	Hardly ever	3	Yes	Employer-sponsored plan	38	Female	4 year college graduate	NOT Hispanic or Latino	1	Very Good	Very Good	Very Good	Very Good	Very Good	Very Good	Completely	Rarely	Moderate	3	16	16	No	No	12	12	24
280	Never	Never	Never	Never	Never	0	Yes	Employer-sponsored plan	26	Male	Some college or 2-year degree	NOT Hispanic or Latino	1	Good	Good	Good	Good	Fair	Good	Completely	Rarely	None	2	12	17	No	No	14	16	30
281	Occasionally	Hardly ever	Occasionally	Never	Never	5	Yes	Public insurance	34	Female	Some college or 2-year degree	NOT Hispanic or Latino	1	Good	Good	Fair	Fair	Fair	Good	Completely	Sometimes	Moderate	5	9	13	No	No	14	14	28
282	Occasionally	Hardly ever	Occasionally	Never	Never	5	Yes	Employer-sponsored plan	47	Female	More than 4-year college degree	NOT Hispanic or Latino	1	Very Good	Very Good	Very Good	Very Good	Excellent	Very Good	Completely	Rarely	Mild	0	17	18	No	No	14	14	28
283	Occasionally	Hardly ever	Occasionally	Hardly ever	Hardly ever	7	Yes	Public insurance	48	Female	Some college or 2-year degree	NOT Hispanic or Latino	1	Fair	Fair	Fair	Fair	Fair	Fair	Not at all	Often	Very Severe	5	9	7	No	No	14	13	27
284	Never	Never	Never	Never	Never	0	Yes	Employer-sponsored plan	56	Female	Some college or 2-year degree	NOT Hispanic or Latino	1	Very Good	Excellent	Very Good	Very Good	Very Good	Very Good	Completely	Never	None	0	18	19	No	No	14	13	27
286	Never	Never	Never	Never	Never	0	Yes	Employer-sponsored plan	26	Male	4 year college graduate	NOT Hispanic or Latino	1	Very Good	Very Good	Very Good	Very Good	Excellent	Excellent	Completely	Rarely	None	0	17	19	No	No	14	14	28
287	Never	Never	Never	Never	Never	0	Yes	Employer-sponsored plan	47	Female	More than 4-year college degree	NOT Hispanic or Latino	1	Very Good	Very Good	Very Good	Very Good	Very Good	Very Good	Completely	Never	Mild	2	17	17	No	No	14	14	28
288	Never	Never	Never	Never	Never	0	Yes	Employer-sponsored plan	33	Female	Some college or 2-year degree	NOT Hispanic or Latino	1	Good	Good	Good	Good	Good	Very Good	Completely	Never	Moderate	7	14	13	No	No	14	14	28
289	Hardly ever	Occasionally	Fairly often	Never	Never	6	Yes	Public insurance	21	Female	High school graduate or GED		2	Very Good	Very Good	Good	Very Good	Good	Very Good	Completely	Sometimes	Mild	2	13	16	No	No	14	14	28
291	Never	Never	Never	Never	Never	0	Yes	Dont know/Other	19	Male	Some college or 2-year degree	NOT Hispanic or Latino	1	Very Good	Excellent	Very Good	Good	Very Good	Excellent	Completely	Sometimes	None	5	14	17	No	No	14	14	28
292	Occasionally	Occasionally	Hardly ever	Occasionally	Never	7	Yes	Employer-sponsored plan	38	Female	Some college or 2-year degree	Hispanic or Latino	1	Very Good	Very Good	Very Good	Excellent	Excellent	Excellent	Mostly	Rarely	Mild	0	18	17	No	No	11	12	23
293	Never	Never	Never	Never	Never	0	Yes	Employer-sponsored plan	30	Female	More than 4-year college degree	NOT Hispanic or Latino	1	Excellent	Very Good	Very Good	Good	Excellent	Excellent	Completely	Sometimes	Mild	0	14	18	No	No	14	14	28
294	Never	Never	Never	Never	Never	0	Yes	Employer-sponsored plan	28	Female	More than 4-year college degree	NOT Hispanic or Latino	1	Good	Excellent	Fair	Excellent	Excellent	Excellent	Completely	Never	Mild	0	20	16	No	No	14	14	28
295	Hardly ever	Hardly ever	Hardly ever	Hardly ever	Hardly ever	5	Yes	Employer-sponsored plan	53	Female	4 year college graduate	NOT Hispanic or Latino	1	Good	Good	Fair	Good	Good	Good	Mostly	Sometimes	Mild	2	11	14	No	No	13	13	26
296	Hardly ever	Hardly ever	Never	Hardly ever	Never	3	Yes	Dont know/Other	19	Female	Some college or 2-year degree	NOT Hispanic or Latino	1	Very Good	Very Good	Very Good	Fair	Fair	Good	Completely	Often	Moderate	1	11	16	No	No	14	14	28
297	Never	Never	Never	Never	Never	0	Yes	Employer-sponsored plan	28	Female	More than 4-year college degree	NOT Hispanic or Latino	1	Very Good	Excellent	Very Good	Very Good	Very Good	Excellent	Completely	Rarely	None	0	17	19	No	No	14	14	28
298	Fairly often	Hardly ever	Occasionally	Hardly ever	Never	7	Yes	Employer-sponsored plan	31	Male	4 year college graduate	NOT Hispanic or Latino	1	Good	Very Good	Good	Very Good	Excellent	Very Good	Completely	Rarely	Mild	2	17	16	No	No	14	14	28
299	Hardly ever	Hardly ever	Hardly ever	Hardly ever	Hardly ever	5	Yes	Employer-sponsored plan	60	Female	Some college or 2-year degree	NOT Hispanic or Latino	1	Good	Very Good	Good	Very Good	Very Good	Very Good	Mostly	Rarely	Mild	3	16	15	No	No	14	14	28
300	Never	Never	Never	Never	Never	0	Yes	Employer-sponsored plan	26	Female	More than 4-year college degree	Hispanic or Latino	1	Good	Very Good	Good	Very Good	Good	Very Good	Completely	Rarely	None	0	15	18	No	No	14	14	28
301	Never	Hardly ever	Hardly ever	Never	Never	2	Yes	Employer-sponsored plan	56	Female	Some college or 2-year degree	Hispanic or Latino	1	Very Good	Excellent	Very Good	Excellent	Excellent	Excellent	Completely	Rarely	None	10	19	15	No	No	14	14	28
302	Never	Hardly ever	Never	Never	Never	1	Yes	Employer-sponsored plan	38	Female	More than 4-year college degree	NOT Hispanic or Latino	1	Very Good	Very Good	Very Good	Good	Very Good	Very Good	Completely	Sometimes	Mild	2	13	17	No	No	14	15	29
303	Never	Never	Never	Never	Never	0	Yes	Employer-sponsored plan	26	Female	More than 4-year college degree	NOT Hispanic or Latino	1	Excellent	Very Good	Very Good	Good	Excellent	Excellent	Completely	Never	None	0	17	19	No	No	14	14	28
304	Occasionally	Occasionally	Hardly ever	Never	Never	5	Yes	Employer-sponsored plan	18	Female	High school graduate or GED	NOT Hispanic or Latino	2	Good	Good	Good	Good	Good	Good	Moderately	Rarely	Moderate	7	13	11	No	No	14	14	28
305	Hardly ever	Never	Hardly ever	Never	Never	2	Yes	Employer-sponsored plan	43	Female	More than 4-year college degree	NOT Hispanic or Latino	1	Very Good	Excellent	Very Good	Very Good	Very Good	Excellent	Completely	Rarely	None	0	17	19	No	No	14	14	28
306	Never	Never	Never	Never	Never	0	Yes	Employer-sponsored plan	25	Female	High school graduate or GED	NOT Hispanic or Latino	1	Very Good	Excellent	Very Good	Excellent	Very Good	Excellent	Moderately	Rarely	None	2	18	16	No	No	13	13	26
307	Never	Never	Never	Never	Never	0	Yes	Self-purchased private plan	68	Female	More than 4-year college degree	NOT Hispanic or Latino	1	Very Good	Very Good	Very Good	Excellent	Excellent	Excellent	Completely	Rarely	None	0	18	19	No	No	13	12	25
308	Never	Hardly ever	Never	Never	Never	1	Yes	Self-purchased private plan	70	Male	More than 4-year college degree	NOT Hispanic or Latino	1	Very Good	Very Good	Good	Very Good	Very Good	Excellent	Moderately	Rarely	Mild	1	16	14	No	No	14	14	28
309	Never	Never	Fairly often	Never	Never	3	No		25	Male	High school graduate or GED	NOT Hispanic or Latino	2	Fair	Good	Good	Good	Good	Very Good	Completely	Rarely	None	1	13	17	No	No	13	13	26
310	Hardly ever	Occasionally	Hardly ever	Never	Never	4	Yes	Employer-sponsored plan	69	Female	More than 4-year college degree	NOT Hispanic or Latino	1	Very Good	Excellent	Very Good	Very Good	Very Good	Very Good	Completely	Never	None	1	18	18	No	No	13	14	27
311	Never	Never	Never	Never	Never	0	Yes	Employer-sponsored plan	69	Male	More than 4-year college degree	NOT Hispanic or Latino	1	Fair	Excellent	Fair	Very Good	Excellent	Excellent	Moderately	Rarely	Moderate	1	18	12	No	No	12	12	24
312	Never	Never	Never	Never	Never	0	Yes	Employer-sponsored plan	41	Female	More than 4-year college degree	NOT Hispanic or Latino	1	Very Good	Very Good	Very Good	Very Good	Very Good	Very Good	Completely	Rarely	Mild	0	16	18	No	No	12	12	24
313	Never	Never	Never	Never	Never	0	Yes	Employer-sponsored plan	57	Female	More than 4-year college degree	NOT Hispanic or Latino	1	Excellent	Excellent	Excellent	Excellent	Excellent	Excellent	Completely	Never	Mild	0	20	19	No	No	13	13	26
314	Hardly ever	Hardly ever	Never	Never	Never	2	No		70	Male	More than 4-year college degree	NOT Hispanic or Latino	1	Excellent	Excellent	Excellent	Excellent	Excellent	Excellent	Completely	Never	None	0	20	20	No	No	14	13	27
315	Never	Never	Never	Never	Never	0	Yes	Employer-sponsored plan	59	Male	More than 4-year college degree	NOT Hispanic or Latino	1	Excellent	Excellent	Excellent	Excellent	Excellent	Excellent	Completely	Rarely	Mild	10	19	15	No	No	14	14	28
316	Occasionally	Hardly ever	Occasionally	Hardly ever	Never	6	Yes	Self-purchased private plan	67	Female	Some college or 2-year degree	NOT Hispanic or Latino	1	Very Good	Very Good	Very Good	Very Good	Very Good	Very Good	Completely	Never	None	2	17	18	No	No	11	12	23
317	Never	Never	Never	Never	Never	0	Yes	Employer-sponsored plan	58	Male	More than 4-year college degree	NOT Hispanic or Latino	1	Excellent	Excellent	Excellent	Excellent	Excellent	Excellent	Completely	Never	None	0	20	20	No	No	14	14	28
318	Never	Never	Occasionally	Never	Never	2	Yes	Employer-sponsored plan	81	Male	More than 4-year college degree	NOT Hispanic or Latino	1	Excellent	Excellent	Excellent	Excellent	Excellent	Excellent	Completely	Never	Moderate	0	20	18	No	No	13	14	27
319	Never	Never	Never	Never	Never	0	Yes	Employer-sponsored plan	58	Female	More than 4-year college degree	NOT Hispanic or Latino	1	Excellent	Very Good	Excellent	Very Good	Excellent	Excellent	Completely	Rarely	Moderate	0	17	18	No	No	16	16	32
320	Never	Hardly ever	Hardly ever	Never	Never	2	Yes	Self-purchased private plan	38	Female	4 year college graduate	NOT Hispanic or Latino	1	Good	Excellent	Good	Excellent	Excellent	Excellent	Mostly	Rarely	Moderate	5	19	13	No	No	14	14	28
321	Never	Never	Never	Never	Never	0	Yes	Self-purchased private plan	74	Female	Some college or 2-year degree	NOT Hispanic or Latino	1	Excellent	Excellent	Excellent	Excellent	Excellent	Excellent	Completely	Never	Mild	2	20	18	No	No	15	14	29
322	Never	Never	Never	Never	Never	0	Yes	Employer-sponsored plan	19	Female	Some college or 2-year degree	NOT Hispanic or Latino	1	Excellent	Excellent	Very Good	Very Good	Very Good	Very Good	Completely	Rarely	Mild	0	17	18	Yes	No	12	14	26
323	Never	Never	Never	Never	Never	0	Yes	Employer-sponsored plan	51	Female	4 year college graduate		1	Very Good	Very Good	Good	Good	Very Good	Very Good	Mostly	Sometimes	Mild	3	13	15	No	No	14	14	28
324	Occasionally	Hardly ever	Never	Never	Never	3	Yes	Employer-sponsored plan	51	Female	4 year college graduate	NOT Hispanic or Latino	1	Very Good	Excellent	Good	Good	Excellent	Very Good	Mostly	Never	Mild	5	18	14	No	No	14	14	28
325	Hardly ever	Occasionally	Never	Never	Never	3	Yes	Employer-sponsored plan	28	Male	4 year college graduate	NOT Hispanic or Latino	1	Very Good	Very Good	Very Good	Very Good	Good	Good	Completely	Rarely	Moderate	3	15	16	No	No	15	13	28
326	Never	Hardly ever	Hardly ever	Never	Never	2	Yes	Employer-sponsored plan	51	Female	Some college or 2-year degree	NOT Hispanic or Latino	1	Very Good	Very Good	Very Good	Very Good	Very Good	Very Good	Completely	Never	None	0	17	19	No	No	14	14	28
328	Never	Never	Never	Never	Never	0	Yes	Employer-sponsored plan	34	Male	More than 4-year college degree	NOT Hispanic or Latino	1	Very Good	Very Good	Very Good	Good	Excellent	Very Good	Completely	Sometimes	Mild	2	14	17	No	No	14	14	28
329	Hardly ever	Hardly ever	Occasionally	Never	Never	4	Yes	Public insurance	18	Male	High school graduate or GED	NOT Hispanic or Latino	2	Good	Good	Good	Good	Very Good	Good	Completely	Rarely	Mild	1	14	16	No	No	14	14	28
330	Occasionally	Hardly ever	Occasionally	Never	Hardly ever	6	Yes	Employer-sponsored plan	36	Female	More than 4-year college degree	NOT Hispanic or Latino	1	Very Good	Excellent	Very Good	Very Good	Excellent	Excellent	Completely	Rarely	None	1	18	18	No	No	14	14	28
331	Never	Hardly ever	Never	Never	Never	1	Yes	Employer-sponsored plan	29	Female	More than 4-year college degree	NOT Hispanic or Latino	1	Very Good	Very Good	Good	Good	Good	Very Good	Completely	Rarely	Mild	3	14	16	No	No	14	14	28
332	Never	Hardly ever	Never	Never	Never	1	Yes	Employer-sponsored plan	20	Female	Some college or 2-year degree	NOT Hispanic or Latino	1	Very Good	Very Good	Very Good	Good	Good	Very Good	Mostly	Often	Moderate	3	13	15	No	No	14	14	28
333	Occasionally	Hardly ever	Hardly ever	Never	Never	4	Yes	Employer-sponsored plan	21	Male	Some college or 2-year degree	NOT Hispanic or Latino	1	Excellent	Very Good	Very Good	Good	Fair	Very Good	Completely	Rarely	Moderate	0	13	17	No	No	14	14	28
334	Never	Hardly ever	Never	Never	Never	1	Yes	Employer-sponsored plan	29	Male	More than 4-year college degree	NOT Hispanic or Latino	1	Very Good	Very Good	Good	Very Good	Very Good	Very Good	Completely	Never	None	8	17	15	No	No	14	14	28
335	Hardly ever	Hardly ever	Hardly ever	Never	Never	3	Yes	Employer-sponsored plan	62	Female	More than 4-year college degree	NOT Hispanic or Latino	1	Good	Very Good	Good	Good	Good	Good	Mostly	Rarely	None	7	14	14	No	No	14	14	28
336	Hardly ever	Hardly ever	Hardly ever	Hardly ever	Hardly ever	5	Yes	Public insurance	18	Female	Some college or 2-year degree	NOT Hispanic or Latino	1	Very Good	Very Good	Very Good	Good	Very Good	Very Good	Completely	Never	None	0	16	19	No	No	14	14	28
337	Never	Never	Never	Never	Never	0	No		75	Female	4 year college graduate	NOT Hispanic or Latino	1	Good	Very Good	Good	Very Good	Very Good	Very Good	Completely	Never	None	0	17	18	No	No	12	14	26
338	Never	Never	Hardly ever	Never	Never	1	Yes	Public insurance	30	Male	More than 4-year college degree	NOT Hispanic or Latino	1	Very Good	Good	Very Good	Fair	Very Good	Good	Completely	Often	Mild	1	12	17	No	No	14	14	28
339	Never	Never	Never	Never	Never	0	Yes	Employer-sponsored plan	29	Female	4 year college graduate	NOT Hispanic or Latino	1	Very Good	Very Good	Very Good	Good	Very Good	Very Good	Completely	Rarely	Mild	1	15	17	No	No	14	14	28
340	Hardly ever	Hardly ever	Never	Never	Never	2	Yes	Employer-sponsored plan	31	Male	4 year college graduate	NOT Hispanic or Latino	1	Very Good	Excellent	Very Good	Excellent	Excellent	Excellent	Completely	Never	None	0	20	19	No	No	14	14	28
341	Never	Never	Never	Never	Never	0	Yes	Employer-sponsored plan	31	Male	4 year college graduate	NOT Hispanic or Latino	2	Excellent	Excellent	Excellent	Excellent	Excellent	Excellent	Completely	Never	Mild	0	20	19	No	No	12	12	24
342	Never	Never	Never	Never	Never	0	No		60	Female	More than 4-year college degree	NOT Hispanic or Latino	2	Good	Good	Good	Good	Good	Good	Moderately	Never	Mild	4	14	13	No	No	15	13	28
343	Occasionally	Hardly ever	Never	Never	Never	3	No		64	Male	More than 4-year college degree	NOT Hispanic or Latino	2	Good	Very Good	Good	Very Good	Excellent	Very Good	Completely	Never	Mild	2	18	16	No	No	13	14	27
344	Never	Never	Never	Never	Never	0	Yes	Employer-sponsored plan	19	Female	Some college or 2-year degree	NOT Hispanic or Latino	1	Excellent	Excellent	Very Good	Very Good	Very Good	Very Good	Completely	Never	Mild	5	18	16	No	No	14	14	28
345	Occasionally	Occasionally	Occasionally	Hardly ever	Hardly ever	8	No		20	Female	Some college or 2-year degree	NOT Hispanic or Latino	1	Good	Very Good	Good	Good	Excellent	Very Good	Completely	Often	Mild	2	15	16	No	No	14	14	28
346	Fairly often	Occasionally	Hardly ever	Never	Never	6	Yes	Employer-sponsored plan	20	Male	Some college or 2-year degree	NOT Hispanic or Latino	1	Very Good	Very Good	Very Good	Very Good	Very Good	Very Good	Completely	Rarely	Mild	0	16	18	No	No	14	14	28
347	Never	Never	Never	Never	Never	0	Yes	Employer-sponsored plan	20	Female	Some college or 2-year degree	NOT Hispanic or Latino	1	Very Good	Very Good	Very Good	Very Good	Very Good	Very Good	Completely	Never	Mild	1	17	17	No	No	14	14	28
348	Never	Never	Never	Never	Never	0	Yes	Employer-sponsored plan	28	Female	4 year college graduate	NOT Hispanic or Latino	1	Very Good	Very Good	Good	Good	Good	Good	Moderately	Sometimes	Moderate	2	12	13	No	No	15	14	29
349	Never	Hardly ever	Occasionally	Occasionally	Never	5	Yes	Employer-sponsored plan	32	Female	4 year college graduate	NOT Hispanic or Latino	1	Very Good	Very Good	Very Good	Good	Very Good	Very Good	Completely	Sometimes	Mild	5	13	16	No	No	14	15	29
350	Never	Never	Never	Never	Never	0	Yes	Self-purchased private plan	69	Female	More than 4-year college degree	NOT Hispanic or Latino	1	Excellent	Very Good	Excellent	Very Good	Good	Very Good	Completely	Sometimes	None	0	13	20	No	No	12	12	24
351	Never	Hardly ever	Never	Never	Never	1	Yes	Employer-sponsored plan	62	Female	More than 4-year college degree	NOT Hispanic or Latino	1	Fair	Fair	Fair	Fair	Good	Fair	Moderately	Rarely	Moderate	1	11	12	No	No	12	12	24
352	Hardly ever	Hardly ever	Hardly ever	Never	Never	3	Yes	Employer-sponsored plan	73	Female	More than 4-year college degree	NOT Hispanic or Latino	1	Good	Very Good	Very Good	Good	Very Good	Very Good	Completely	Sometimes	None	0	13	19	No	No	14	11	25
353	Hardly ever	Hardly ever	Occasionally	Hardly ever	Never	5	No		67	Male	More than 4-year college degree	NOT Hispanic or Latino	1	Excellent	Excellent	Excellent	Very Good	Very Good	Excellent	Completely	Rarely	None	1	17	19	No	No	13	13	26
354	Never	Never	Fairly often	Never	Never	3	Yes	Employer-sponsored plan	64	Female	4 year college graduate	NOT Hispanic or Latino	1	Very Good	Very Good	Very Good	Good	Good	Very Good	Completely	Sometimes	Mild	1	12	17	No	No	14	14	28
355	Never	Never	Fairly often	Never	Never	3	Yes	Employer-sponsored plan	27	Male	4 year college graduate	NOT Hispanic or Latino	1	Excellent	Very Good	Excellent	Very Good	Excellent	Very Good	Completely	Never	Mild	0	18	19	No	No	16	16	32
356	Hardly ever	Never	Hardly ever	Never	Never	2	Yes	Employer-sponsored plan	27	Male	4 year college graduate	NOT Hispanic or Latino	1	Very Good	Excellent	Very Good	Very Good	Very Good	Very Good	Completely	Never	None	0	18	19	No	No	14	14	28
357	Never	Never	Occasionally	Never	Never	2	Yes	Employer-sponsored plan	29	Male	4 year college graduate	NOT Hispanic or Latino	1	Very Good	Very Good	Very Good	Good	Very Good	Very Good	Completely	Rarely	None	1	15	18	No	No	14	14	28
358	Occasionally	Occasionally	Occasionally	Never	Never	6	Yes	Public insurance	28	Female	4 year college graduate	NOT Hispanic or Latino	1	Excellent	Excellent	Very Good	Very Good	Excellent	Excellent	Completely	Rarely	Mild	0	18	18	No	No	12	12	24
359	Never	Hardly ever	Never	Never	Never	1	Yes	Dont know/Other	20	Male	High school graduate or GED	NOT Hispanic or Latino	1	Very Good	Very Good	Very Good	Good	Very Good	Very Good	Completely	Rarely	Mild	2	15	17	No	No	14	16	30
360	Hardly ever	Never	Hardly ever	Never	Never	2	No		50	Female	4 year college graduate	NOT Hispanic or Latino	1	Very Good	Good	Very Good	Good	Good	Very Good	Completely	Sometimes	Mild	0	11	18	No	No	14	14	28
361	Occasionally	Occasionally	Occasionally	Never	Hardly ever	7	Yes	Employer-sponsored plan	26	Female	4 year college graduate	NOT Hispanic or Latino	1	Very Good	Very Good	Very Good	Good	Very Good	Very Good	Completely	Sometimes	Mild	2	13	17	No	No	14	14	28
362	Never	Never	Never	Never	Never	0	Yes	Public insurance	63	Female	4 year college graduate	NOT Hispanic or Latino	1	Excellent	Excellent	Excellent	Excellent	Excellent	Excellent	Completely	Never	None	0	20	20	No	No	12	14	26
363	Never	Never	Hardly ever	Never	Never	1	Yes	Employer-sponsored plan	26	Male	4 year college graduate	Hispanic or Latino	1	Very Good	Very Good	Good	Good	Excellent	Very Good	Completely	Sometimes	Moderate	3	14	15	No	No	14	14	28
364	Hardly ever	Occasionally	Occasionally	Hardly ever	Never	6	Yes	Employer-sponsored plan	26	Male	4 year college graduate	NOT Hispanic or Latino	1	Good	Good	Very Good	Fair	Good	Good	Mostly	Often	Mild	5	11	15	No	No	16	16	32
365	Never	Never	Occasionally	Never	Never	2	Yes	Dont know/Other	25	Female	More than 4-year college degree	NOT Hispanic or Latino	1	Good	Good	Good	Good	Good	Good	Mostly	Sometimes	Mild	5	11	14	No	No	12	14	26
366	Never	Never	Never	Never	Never	0	Yes	Employer-sponsored plan	61	Male	More than 4-year college degree		1	Very Good	Very Good	Very Good	Very Good	Good	Very Good	Completely	Never	Moderate	5	16	15	No	No	14	14	28
367	Never	Never	Hardly ever	Never	Never	1	Yes	Employer-sponsored plan	32	Female	More than 4-year college degree	Hispanic or Latino	1	Fair	Good	Good	Good	Good	Very Good	Completely	Sometimes	Moderate	0	11	16	No	No	14	14	28
368	Never	Never	Never	Never	Never	0	Yes	Employer-sponsored plan	53	Male	4 year college graduate	NOT Hispanic or Latino	1	Very Good	Excellent	Very Good	Excellent	Excellent	Excellent	Completely	Never	None	0	20	19	No	No	14	14	28
369	Hardly ever	Never	Never	Never	Never	1	Yes	Employer-sponsored plan	19	Male	Some college or 2-year degree	NOT Hispanic or Latino	1	Very Good	Very Good	Very Good	Very Good	Good	Very Good	Completely	Rarely	Mild	1	15	17	No	No	14	16	30
370	Hardly ever	Occasionally	Occasionally	Never	Never	5	Yes	Employer-sponsored plan	51	Male	4 year college graduate	NOT Hispanic or Latino	1	Good	Good	Good	Fair	Good	Good	Mostly	Rarely	Mild	1	12	15	No	No	16	15	31
371	Never	Never	Never	Never	Never	0	Yes	Employer-sponsored plan	39	Male	Some college or 2-year degree	NOT Hispanic or Latino	1	Good	Very Good	Good	Very Good	Very Good	Very Good	Completely	Never	Mild	5	17	15	No	No	14	14	28
372	Never	Never	Never	Never	Never	0	Yes	Employer-sponsored plan	39	Female	More than 4-year college degree	NOT Hispanic or Latino	1	Very Good	Excellent	Very Good	Very Good	Excellent	Excellent	Completely	Never	Mild	2	19	17	No	No	14	14	28
373	Hardly ever	Hardly ever	Never	Never	Never	2	Yes	Employer-sponsored plan	47	Male	More than 4-year college degree	NOT Hispanic or Latino	1	Very Good	Very Good	Good	Very Good	Good	Very Good	Mostly	Never	Moderate	5	16	13	No	No	14	14	28
374	Never	Never	Never	Never	Never	0	Yes	Employer-sponsored plan	19	Male	High school graduate or GED	NOT Hispanic or Latino	1	Excellent	Excellent	Excellent	Very Good	Excellent	Excellent	Completely	Rarely	None	0	18	20	No	No	14	14	28
375	Hardly ever	Hardly ever	Never	Never	Never	2	No		26	Female	More than 4-year college degree	NOT Hispanic or Latino	1	Excellent	Excellent	Excellent	Excellent	Excellent	Excellent	Completely	Never	Moderate	0	20	18	No	No	14	14	28
376	Hardly ever	Hardly ever	Hardly ever	Never	Never	3	Yes	Employer-sponsored plan	61	Male	More than 4-year college degree	NOT Hispanic or Latino	1	Very Good	Very Good	Very Good	Very Good	Very Good	Very Good	Completely	Rarely	Mild	1	16	17	No	No	16	16	32
377	Never	Never	Never	Never	Never	0	Yes	Employer-sponsored plan	26	Female	More than 4-year college degree	NOT Hispanic or Latino	1	Excellent	Excellent	Excellent	Very Good	Very Good	Excellent	Completely	Rarely	Mild	2	17	18	No	No	14	14	28
378	Hardly ever	Hardly ever	Hardly ever	Never	Never	3	No		32	Female	4 year college graduate	NOT Hispanic or Latino	1	Fair	Good	Good	Fair	Fair	Fair	Completely	Never	None	0	12	18	No	No	13	14	27
379	Never	Never	Never	Never	Never	0	No		62	Female	Some college or 2-year degree	NOT Hispanic or Latino	1	Very Good	Excellent	Very Good	Excellent	Excellent	Excellent	Completely	Never	Mild	3	20	17	No	No	12	14	26
380	Never	Never	Never	Never	Never	0	Yes	Employer-sponsored plan	27	Male	4 year college graduate	NOT Hispanic or Latino	1	Very Good	Very Good	Very Good	Very Good	Very Good	Excellent	A little	Rarely	Mild	5	16	13	No	No	14	14	28
381	Very often	Hardly ever	Fairly often	Never	Occasionally	10	Yes	Dont know/Other	21	Female	Some college or 2-year degree	NOT Hispanic or Latino	1	Very Good	Excellent	Very Good	Very Good	Very Good	Excellent	Completely	Often	Mild	0	16	18	No	No	14	14	28
382	Never	Never	Never	Never	Never	0	Yes	Employer-sponsored plan	20	Female	Some college or 2-year degree	NOT Hispanic or Latino	1	Excellent	Excellent	Excellent	Excellent	Excellent	Excellent	Completely	Never	None	0	20	20	No	No	14	14	28
383	Hardly ever	Never	Never	Never	Never	1	Yes	Employer-sponsored plan	38	Female	4 year college graduate	NOT Hispanic or Latino	2	Very Good	Very Good	Very Good	Very Good	Excellent	Very Good	Completely	Rarely	Moderate	2	17	16	No	No	14	14	28
384	Hardly ever	Occasionally	Hardly ever	Never	Never	4	Yes	Employer-sponsored plan	39	Female	More than 4-year college degree	NOT Hispanic or Latino	1	Very Good	Very Good	Good	Very Good	Very Good	Very Good	Mostly	Often	Mild	1	15	15	No	No	14	13	27
385	Never	Hardly ever	Occasionally	Never	Never	3	Yes	Employer-sponsored plan	56	Female	More than 4-year college degree	NOT Hispanic or Latino	1	Very Good	Excellent	Very Good	Excellent	Excellent	Excellent	Completely	Never	Mild	0	20	18	No	No	16	16	32
386	Occasionally	Occasionally	Fairly often	Hardly ever	Never	8	Yes	Employer-sponsored plan	29	Male	4 year college graduate	NOT Hispanic or Latino	1	Very Good	Very Good	Very Good	Good	Very Good	Very Good	Completely	Rarely	Moderate	4	15	15	No	No	14	14	28
387	Hardly ever	Hardly ever	Occasionally	Never	Never	4	Yes	Employer-sponsored plan	49	Female	Some college or 2-year degree	NOT Hispanic or Latino	1	Very Good	Very Good	Good	Very Good	Very Good	Very Good	Completely	Rarely	Mild	2	16	16	No	No	14	14	28
389	Never	Never	Never	Never	Never	0	Yes	Employer-sponsored plan	51	Female	Some college or 2-year degree	NOT Hispanic or Latino	1	Excellent	Excellent	Excellent	Excellent	Excellent	Excellent	Completely	Never	None	0	20	20	No	No	14	14	28
390	Hardly ever	Never	Never	Never	Never	1	Yes	Self-purchased private plan	19	Male	High school graduate or GED		2	Excellent	Excellent	Excellent	Excellent	Excellent	Excellent	Completely	Always	Mild	1	16	18	No	No	14	14	28
392	Never	Occasionally	Very often	Never	Never	6	No		29	Male	High school graduate or GED	NOT Hispanic or Latino	1	Fair	Good	Good	Excellent	Excellent	Excellent	Completely	Rarely	None	0	17	18	No	No	15	15	30
393	Occasionally	Occasionally	Hardly ever	Hardly ever	Hardly ever	7	Yes	Employer-sponsored plan	62	Male	4 year college graduate	NOT Hispanic or Latino	1	Very Good	Very Good	Very Good	Very Good	Very Good	Very Good	Completely	Never	Mild	1	17	17	No	No	14	15	29
394	Never	Never	Never	Never	Never	0	Yes	Employer-sponsored plan	20	Male	Some college or 2-year degree	NOT Hispanic or Latino	1	Excellent	Very Good	Excellent	Very Good	Very Good	Very Good	Completely	Never	None	5	17	18	No	No	16	16	32
395	Never	Never	Never	Never	Never	0	Yes	Dont know/Other	66	Female	4 year college graduate	NOT Hispanic or Latino	1	Excellent	Excellent	Excellent	Excellent	Excellent	Excellent	Completely	Never	None	0	20	20	No	No	14	11	25
396	Never	Hardly ever	Hardly ever	Never	Never	2	Yes	Employer-sponsored plan	26	Female	4 year college graduate	NOT Hispanic or Latino	1	Good	Good	Good	Good	Very Good	Very Good	Completely	Rarely	Mild	2	14	16	No	No	14	14	28
397	Hardly ever	Hardly ever	Occasionally	Never	Never	4	Yes	Employer-sponsored plan	29	Male	More than 4-year college degree	Hispanic or Latino	2	Very Good	Excellent	Excellent	Very Good	Very Good	Excellent	Completely	Rarely	None	0	17	20	No	No	12	12	24
398	Never	Never	Never	Never	Never	0	No		23	Female	4 year college graduate	NOT Hispanic or Latino	1	Excellent	Excellent	Excellent	Excellent	Excellent	Excellent	Completely	Never	None	1	20	19	No	No	14	14	28
399	Hardly ever	Hardly ever	Hardly ever	Hardly ever	Hardly ever	5	Yes	Employer-sponsored plan	50	Female	More than 4-year college degree	NOT Hispanic or Latino	1	Very Good	Very Good	Very Good	Very Good	Very Good	Very Good	Completely	Never	None	0	17	19	No	No	14	14	28
400	Occasionally	Hardly ever	Hardly ever	Occasionally	Hardly ever	7	Yes	Employer-sponsored plan	28	Male	More than 4-year college degree	NOT Hispanic or Latino	1	Fair	Good	Fair	Good	Good	Fair	Completely	Rarely	Mild	5	13	14	No	No	16	15	31
401	Hardly ever	Never	Hardly ever	Never	Never	2	Yes	Employer-sponsored plan	26	Female	More than 4-year college degree	NOT Hispanic or Latino	1	Very Good	Good	Very Good	Very Good	Very Good	Very Good	Completely	Rarely	Moderate	1	15	16	No	No	14	14	28
403	Hardly ever	Hardly ever	Hardly ever	Hardly ever	Never	4	Yes	Employer-sponsored plan	38	Female	More than 4-year college degree	NOT Hispanic or Latino	1	Good	Good	Good	Good	Good	Good	Completely	Never	Mild	0	14	17	No	No	16	16	32
404	Hardly ever	Hardly ever	Hardly ever	Never	Never	3	Yes	Employer-sponsored plan	70	Female	More than 4-year college degree	NOT Hispanic or Latino	1	Very Good	Excellent	Very Good	Excellent	Excellent	Excellent	Completely	Never	None	1	20	18	No	No	14	12	26
405	Hardly ever	Hardly ever	Hardly ever	Hardly ever	Hardly ever	5	Yes	Dont know/Other	20	Male	Some college or 2-year degree	NOT Hispanic or Latino	1	Good	Good	Good	Good	Good	Good	Mostly	Often	Moderate	1	12	14	No	No	16	13	29
406	Hardly ever	Hardly ever	Hardly ever	Hardly ever	Hardly ever	5	Yes	Employer-sponsored plan	22	Female	4 year college graduate	NOT Hispanic or Latino	2	Very Good	Very Good	Very Good	Very Good	Very Good	Very Good	Mostly	Rarely	Mild	5	16	15	No	No	12	14	26
407	Occasionally	Hardly ever	Never	Never	Never	3	Yes	Dont know/Other	19	Male	High school graduate or GED	NOT Hispanic or Latino	1	Excellent	Excellent	Excellent	Excellent	Excellent	Excellent	Completely	Rarely	Mild	0	19	19	No	No	16	16	32
408	Never	Never	Never	Never	Never	0	Yes	Employer-sponsored plan	30	Male	More than 4-year college degree	NOT Hispanic or Latino	2	Very Good	Good	Very Good	Very Good	Very Good	Very Good	Completely	Never	None	2	16	18	No	No	16	14	30
409	Very often	Very often	Very often	Occasionally	Fairly often	17	Yes	Public insurance	28	Male	Some high school but did not graduate	NOT Hispanic or Latino	1	Fair	Very Good	Good	Good	Good	Good	Completely	Rarely	None	3	14	17	No	No	15	16	31
410	Very often	Very often	Very often	Very often	Occasionally	18	No		73	Male	Some college or 2-year degree	NOT Hispanic or Latino	1	Fair	Good	Fair	Good	Good	Good	Moderately	Sometimes	Moderate	4	11	11	Yes	No	0	8	8
411	Never	Hardly ever	Hardly ever	Never	Never	2	Yes	Employer-sponsored plan	59	Male	4 year college graduate	NOT Hispanic or Latino	1	Very Good	Very Good	Very Good	Excellent	Very Good	Excellent	Completely	Never	Mild	1	18	17	No	No	14	14	28
412	Occasionally	Occasionally	Occasionally	Occasionally	Occasionally	10	No		44	Female	Some college or 2-year degree	NOT Hispanic or Latino	1	Good	Good	Good	Good	Good	Good	Moderately	Often	Moderate	5	12	12	No	No	4	1	5
413	Hardly ever	Never	Never	Never	Never	1	Yes	Employer-sponsored plan	30	Female	4 year college graduate	NOT Hispanic or Latino	2	Very Good	Very Good	Very Good	Very Good	Very Good	Very Good	Completely	Rarely	Mild	0	16	18	No	No	12	12	24
414	Hardly ever	Never	Occasionally	Never	Never	3	Yes	Self-purchased private plan	51	Female	More than 4-year college degree	NOT Hispanic or Latino	1	Very Good	Good	Good	Fair	Fair	Fair	Mostly	Always	Moderate	5	8	13	No	No	14	14	28
415	Hardly ever	Hardly ever	Occasionally	Hardly ever	Never	5	Yes	Dont know/Other	18	Female	High school graduate or GED	NOT Hispanic or Latino	2	Good	Very Good	Fair	Good	Excellent	Excellent	Completely	Rarely	Moderate	5	16	13	No	No	14	14	28
416	Occasionally	Occasionally	Occasionally	Occasionally	Occasionally	10	No		21	Male	Some college or 2-year degree	NOT Hispanic or Latino	2	Good	Good	Good	Good	Good	Good	Moderately	Often	Moderate	5	12	12	No	No	14	14	28
417	Never	Never	Never	Never	Never	0	No		56	Male	More than 4-year college degree	NOT Hispanic or Latino	1	Excellent	Excellent	Excellent	Excellent	Excellent	Excellent	Completely	Rarely	Moderate	0	19	18	No	No	14	14	28
418	Hardly ever	Never	Occasionally	Never	Never	3	Yes	Employer-sponsored plan	36	Female	More than 4-year college degree	NOT Hispanic or Latino	1	Very Good	Very Good	Very Good	Very Good	Good	Very Good	Completely	Rarely	Mild	1	15	17	No	No	14	14	28
419	Hardly ever	Hardly ever	Occasionally	Never	Never	4	Yes	Employer-sponsored plan	29	Male	More than 4-year college degree	NOT Hispanic or Latino	1	Very Good	Very Good	Very Good	Very Good	Very Good	Very Good	Completely	Rarely	Mild	1	16	17	No	No	14	14	28
420	Fairly often	Hardly ever	Fairly often	Never	Hardly ever	8	Yes	Employer-sponsored plan	22	Female	4 year college graduate	NOT Hispanic or Latino	2	Very Good	Very Good	Excellent	Good	Very Good	Excellent	Completely	Never	Moderate	2	16	17	No	No	14	14	28
421	Occasionally	Hardly ever	Hardly ever	Hardly ever	Hardly ever	6	Yes	Employer-sponsored plan	27	Male	4 year college graduate	NOT Hispanic or Latino	1	Good	Very Good	Very Good	Fair	Very Good	Very Good	Mostly	Often	Moderate	5	13	14	No	No	12	13	25
422	Never	Occasionally	Occasionally	Never	Never	4	No		27	Female	More than 4-year college degree	NOT Hispanic or Latino	1	Very Good	Very Good	Fair	Fair	Very Good	Very Good	Completely	Sometimes	Mild	2	12	15	No	No	14	14	28
424	Never	Never	Never	Never	Never	0	Yes	Employer-sponsored plan	41	Female	High school graduate or GED	NOT Hispanic or Latino	1	Very Good	Fair	Fair	Fair	Fair	Fair	Mostly	Sometimes	Mild	5	8	13	No	No	16	16	32
425	Never	Never	Never	Never	Never	0	Don't know/Not sure		33	Female	Some college or 2-year degree	NOT Hispanic or Latino	1	Excellent	Excellent	Excellent	Excellent	Excellent	Excellent	Completely	Never	None	0	20	20	No	No	16	16	32
426	Never	Never	Never	Never	Never	0	Yes	Employer-sponsored plan	26	Male	4 year college graduate		1	Very Good	Good	Good	Excellent	Very Good	Very Good	Completely	Never	Mild	2	17	16	No	No	14	14	28
427	Hardly ever	Hardly ever	Never	Never	Never	2	Yes	Employer-sponsored plan	24	Female	4 year college graduate	NOT Hispanic or Latino	1	Very Good	Very Good	Very Good	Very Good	Very Good	Very Good	Completely	Rarely	Mild	0	16	18	No	No	12	14	26
428	Hardly ever	Hardly ever	Never	Never	Never	2	Don't know/Not sure		18	Female	High school graduate or GED	NOT Hispanic or Latino	1	Very Good	Excellent	Very Good	Good	Excellent	Excellent	Mostly	Often	None	0	16	18	No	No	14	14	28
429	Never	Never	Never	Never	Never	0	No		73	Male	More than 4-year college degree	NOT Hispanic or Latino	1	Very Good	Very Good	Very Good	Very Good	Very Good	Very Good	Completely	Never	None	0	17	19	No	No	12	12	24
430	Never	Hardly ever	Occasionally	Never	Never	3	Yes	Self-purchased private plan	67	Female	More than 4-year college degree	NOT Hispanic or Latino	1	Excellent	Excellent	Excellent	Excellent	Very Good	Excellent	Completely	Rarely	Mild	1	18	18	No	No	14	11	25
431	Hardly ever	Hardly ever	Fairly often	Never	Never	5	Yes	Public insurance	18	Male	High school graduate or GED	NOT Hispanic or Latino	1	Good	Very Good	Very Good	Good	Fair	Fair	Completely	Rarely	Moderate	4	13	15	No	No	12	12	24
432	Never	Never	Hardly ever	Never	Never	1	Yes	Self-purchased private plan	56	Female	More than 4-year college degree	NOT Hispanic or Latino	1	Very Good	Very Good	Good	Excellent	Excellent	Very Good	Completely	Never	None	0	19	18	No	No	14	14	28
433	Occasionally	Never	Never	Never	Never	2	No		29	Female	4 year college graduate		1	Very Good	Very Good	Good	Very Good	Very Good	Very Good	Completely	Never	None	0	17	18	No	No	14	14	28
434	Never	Never	Never	Never	Never	0	No		59	Female	More than 4-year college degree	NOT Hispanic or Latino	1	Very Good	Very Good	Very Good	Very Good	Very Good	Very Good	Completely	Never	None	1	17	18	No	No	10	10	20
435	Never	Never	Never	Never	Never	0	No		29	Male	More than 4-year college degree	NOT Hispanic or Latino	1	Very Good	Excellent	Very Good	Very Good	Excellent	Excellent	Completely	Never	Mild	0	19	18	No	No	14	14	28
436	Never	Never	Hardly ever	Never	Never	1	No		21	Male	High school graduate or GED	NOT Hispanic or Latino	2	Good	Good	Good	Excellent	Very Good	Excellent	Completely	Sometimes	Moderate	0	14	16	No	No	14	14	28
437	Never	Never	Hardly ever	Never	Never	1	Yes	Employer-sponsored plan	25	Male	More than 4-year college degree	NOT Hispanic or Latino	2	Excellent	Excellent	Excellent	Excellent	Very Good	Excellent	Completely	Rarely	Mild	1	18	18	No	No	14	14	28
438	Never	Never	Never	Never	Never	0	Yes	Employer-sponsored plan	55	Male	4 year college graduate	NOT Hispanic or Latino	1	Very Good	Very Good	Very Good	Very Good	Very Good	Very Good	Mostly	Rarely	Moderate	5	16	14	No	No	12	12	24
439	Occasionally	Occasionally	Never	Never	Never	4	Yes	Public insurance	26	Female	4 year college graduate	NOT Hispanic or Latino	2	Excellent	Very Good	Very Good	Very Good	Very Good	Very Good	Completely	Sometimes	Moderate	1	14	16	No	No	14	14	28
440	Never	Never	Hardly ever	Never	Never	1	Yes	Employer-sponsored plan	38	Female	More than 4-year college degree	NOT Hispanic or Latino	1	Very Good	Very Good	Very Good	Very Good	Very Good	Very Good	Completely	Rarely	Mild	1	16	17	No	No	12	14	26
441	Hardly ever	Never	Hardly ever	Hardly ever	Hardly ever	4	Don't know/Not sure		21	Female	Some college or 2-year degree	NOT Hispanic or Latino	1	Good	Very Good	Good	Very Good	Very Good	Very Good	Completely	Rarely	None	1	16	17	No	No	14	14	28
442	Never	Never	Never	Never	Never	0	Yes	Employer-sponsored plan	25	Female	4 year college graduate	NOT Hispanic or Latino	1	Very Good	Very Good	Good	Good	Very Good	Very Good	Completely	Sometimes	Mild	0	13	17	No	No	14	14	28
443	Never	Never	Never	Never	Never	0	Yes	Employer-sponsored plan	32	Female	More than 4-year college degree	NOT Hispanic or Latino	1	Very Good	Very Good	Very Good	Very Good	Very Good	Very Good	Completely	Never	None	0	17	19	No	No	14	14	28
444	Hardly ever	Hardly ever	Never	Never	Never	2	Yes	Employer-sponsored plan	18	Female	High school graduate or GED	NOT Hispanic or Latino	1	Excellent	Excellent	Excellent	Excellent	Excellent	Excellent	Completely	Never	None	0	20	20	No	No	14	14	28
445	Never	Hardly ever	Never	Never	Never	1	Yes	Employer-sponsored plan	53	Male	More than 4-year college degree	NOT Hispanic or Latino	1	Excellent	Excellent	Excellent	Excellent	Excellent	Excellent	Completely	Never	None	0	20	20	No	No	16	16	32
446	Never	Hardly ever	Never	Never	Never	1	Yes	Employer-sponsored plan	52	Male	More than 4-year college degree	NOT Hispanic or Latino	1	Very Good	Very Good	Good	Very Good	Very Good	Very Good	Completely	Never	None	0	17	18	No	No	16	16	32
447	Hardly ever	Never	Occasionally	Never	Never	3	Yes	Employer-sponsored plan	23	Female	4 year college graduate	NOT Hispanic or Latino	1	Very Good	Very Good	Very Good	Fair	Good	Good	Mostly	Always	Moderate	2	10	15	No	No	14	14	28
448	Never	Never	Never	Never	Never	0	No		32	Male	4 year college graduate	NOT Hispanic or Latino	2	Good	Very Good	Good	Good	Very Good	Good	Mostly	Rarely	Mild	8	15	13	No	No	14	14	28
449	Never	Never	Never	Never	Never	0	No		29	Female	More than 4-year college degree	NOT Hispanic or Latino	2	Good	Good	Good	Good	Good	Good	Mostly	Never	None	2	14	16	No	No	15	14	29
450	Never	Never	Never	Never	Never	0	Yes	Public insurance	39	Male	More than 4-year college degree	NOT Hispanic or Latino	2	Excellent	Excellent	Excellent	Excellent	Excellent	Excellent	Mostly	Rarely	Mild	0	19	18	No	No	0	0	0
451	Never	Occasionally	Occasionally	Never	Never	4	Yes	Employer-sponsored plan	59	Female	4 year college graduate	NOT Hispanic or Latino	1	Very Good	Very Good	Very Good	Very Good	Good	Very Good	Completely	Never	Mild	3	16	17	No	No	14	13	27
452	Occasionally	Hardly ever	Hardly ever	Hardly ever	Occasionally	7	No		26	Male	4 year college graduate	NOT Hispanic or Latino	1	Excellent	Very Good	Very Good	Very Good	Very Good	Very Good	Completely	Sometimes	None	1	14	18	No	No	14	14	28
453	Never	Never	Never	Never	Never	0	Yes	Employer-sponsored plan	61	Female	4 year college graduate	NOT Hispanic or Latino	1	Very Good	Very Good	Very Good	Excellent	Excellent	Excellent	Completely	Never	Mild	1	19	17	No	No	12	14	26
454	Never	Never	Never	Never	Occasionally	2	Yes	Employer-sponsored plan	42	Male	4 year college graduate		1	Excellent	Excellent	Excellent	Excellent	Very Good	Excellent	Completely	Rarely	Mild	1	18	18	No	No	14	14	28
455	Occasionally	Hardly ever	Hardly ever	Never	Never	4	Yes	Employer-sponsored plan	23	Female	Some college or 2-year degree	NOT Hispanic or Latino	1	Very Good	Very Good	Very Good	Very Good	Very Good	Very Good	Completely	Never	None	0	17	19	No	No	16	14	30
456	Never	Never	Never	Never	Never	0	Yes	Self-purchased private plan	21	Female	Some college or 2-year degree	NOT Hispanic or Latino	1	Good	Good	Very Good	Very Good	Very Good	Good	Completely	Rarely	Mild	0	15	18	No	No	14	14	28
457	Hardly ever	Hardly ever	Hardly ever	Never	Never	3	No		63	Female	Some college or 2-year degree	NOT Hispanic or Latino	1	Excellent	Excellent	Very Good	Excellent	Excellent	Excellent	Completely	Never	None	1	20	18	No	No	13	13	26
458	Hardly ever	Hardly ever	Occasionally	Hardly ever	Hardly ever	6	Yes	Employer-sponsored plan	27	Female	4 year college graduate	NOT Hispanic or Latino	1	Very Good	Very Good	Very Good	Very Good	Very Good	Very Good	Completely	Rarely	Mild	0	16	18	No	No	14	14	28
459	Never	Never	Never	Never	Never	0	Yes	Employer-sponsored plan	53	Female	More than 4-year college degree	NOT Hispanic or Latino	1	Excellent	Very Good	Very Good	Very Good	Very Good	Excellent	Completely	Rarely	Moderate	0	16	17	No	No	13	14	27
460	Occasionally	Hardly ever	Never	Never	Never	3	Yes	Employer-sponsored plan	39	Female	More than 4-year college degree	NOT Hispanic or Latino	1	Excellent	Excellent	Very Good	Very Good	Very Good	Very Good	Completely	Sometimes	Moderate	2	15	16	No	No	14	14	28
461	Hardly ever	Never	Hardly ever	Never	Hardly ever	3	No		27	Female	More than 4-year college degree	NOT Hispanic or Latino	2	Very Good	Very Good	Very Good	Excellent	Very Good	Very Good	Completely	Rarely	Mild	2	17	17	No	No	14	14	28
462	Never	Never	Never	Never	Never	0	No		28	Male	More than 4-year college degree	NOT Hispanic or Latino	2	Very Good	Excellent	Excellent	Excellent	Excellent	Excellent	Completely	Never	None	0	20	20	No	No	14	14	28
463	Never	Never	Occasionally	Never	Never	2	Yes	Employer-sponsored plan	52	Female	More than 4-year college degree	NOT Hispanic or Latino	1	Very Good	Very Good	Very Good	Excellent	Very Good	Excellent	Completely	Rarely	Mild	1	17	17	No	No	14	14	28
464	Never	Hardly ever	Never	Never	Never	1	Yes	Employer-sponsored plan	29	Female	More than 4-year college degree	NOT Hispanic or Latino	2	Very Good	Very Good	Very Good	Very Good	Very Good	Very Good	Completely	Rarely	Mild	0	16	18	No	No	16	14	30
465	Never	Never	Never	Never	Never	0	Yes	Employer-sponsored plan	20	Female	Some college or 2-year degree	NOT Hispanic or Latino	1	Very Good	Good	Good	Good	Good	Fair	Completely	Rarely	Moderate	1	13	15	No	No	14	14	28
466	Hardly ever	Hardly ever	Occasionally	Hardly ever	Hardly ever	6	Yes	Employer-sponsored plan	20	Male	High school graduate or GED	NOT Hispanic or Latino	1	Good	Good	Fair	Good	Very Good	Very Good	Completely	Rarely	None	1	14	16	No	No	14	14	28
467	Never	Never	Never	Never	Never	0	Yes	Employer-sponsored plan	46	Female	More than 4-year college degree	NOT Hispanic or Latino	1	Very Good	Very Good	Very Good	Very Good	Very Good	Very Good	Completely	Never	Mild	2	17	17	No	No	14	14	28
468	Very often	Fairly often	Occasionally	Never	Hardly ever	10	Don't know/Not sure		19	Female	Some college or 2-year degree	NOT Hispanic or Latino	2	Good	Good	Very Good	Good	Good	Good	Moderately	Often	Mild	6	12	14	No	No	14	14	28
469	Hardly ever	Hardly ever	Hardly ever	Occasionally	Never	5	Yes	Employer-sponsored plan	24	Female	4 year college graduate	NOT Hispanic or Latino	1	Very Good	Excellent	Very Good	Good	Very Good	Very Good	Completely	Sometimes	Mild	0	14	18	No	No	14	14	28
470	Never	Never	Occasionally	Never	Never	2	Yes	Employer-sponsored plan	40	Female	More than 4-year college degree		1	Excellent	Very Good	Very Good	Very Good	Very Good	Excellent	Completely	Never	None	0	17	19	No	No	14	14	28
471	Occasionally	Never	Occasionally	Never	Never	4	Yes	Employer-sponsored plan	26	Female	More than 4-year college degree	NOT Hispanic or Latino	2	Excellent	Excellent	Excellent	Very Good	Very Good	Very Good	Completely	Rarely	Moderate	5	17	16	No	No	13	14	27
472	Never	Never	Never	Never	Never	0	Yes	Employer-sponsored plan	63	Female	4 year college graduate	NOT Hispanic or Latino	1	Very Good	Very Good	Very Good	Very Good	Excellent	Excellent	Completely	Never	None	1	18	18	No	No	12	12	24
473	Hardly ever	Occasionally	Hardly ever	Never	Never	4	Yes	Self-purchased private plan	24	Female	4 year college graduate	NOT Hispanic or Latino	1	Very Good	Excellent	Good	Very Good	Very Good	Very Good	Completely	Never	None	0	18	18	No	No	14	14	28
475	Never	Never	Never	Never	Never	0	Yes	Employer-sponsored plan	25	Female	More than 4-year college degree	NOT Hispanic or Latino	1	Excellent	Excellent	Excellent	Excellent	Excellent	Excellent	Completely	Never	Mild	1	20	18	No	No	14	14	28
476	Never	Occasionally	Never	Never	Never	2	Yes	Employer-sponsored plan	56	Female	More than 4-year college degree	NOT Hispanic or Latino	1	Good	Very Good	Good	Good	Good	Excellent	Completely	Rarely	Mild	0	14	17	No	No	14	14	28
477	Never	Never	Never	Never	Never	0	No		19	Female	High school graduate or GED	NOT Hispanic or Latino	1	Very Good	Very Good	Very Good	Very Good	Very Good	Very Good	Completely	Rarely	None	0	16	19	No	No	14	14	28
479	Never	Never	Never	Never	Never	0	Yes	Employer-sponsored plan	24	Male	4 year college graduate	NOT Hispanic or Latino	1	Very Good	Very Good	Very Good	Good	Excellent	Excellent	Completely	Rarely	None	0	16	19	No	No	14	14	28
480	Never	Never	Never	Never	Never	0	Yes	Employer-sponsored plan	56	Female	More than 4-year college degree	NOT Hispanic or Latino	1	Excellent	Excellent	Excellent	Excellent	Excellent	Excellent	Completely	Never	Mild	2	20	18	No	No	16	16	32
481	Occasionally	Occasionally	Occasionally	Hardly ever	Hardly ever	8	Yes	Employer-sponsored plan	74	Male	More than 4-year college degree	NOT Hispanic or Latino	1	Good	Very Good	Good	Very Good	Very Good	Very Good	Mostly	Rarely	Mild	3	16	15	No	No	14	14	28
482	Hardly ever	Never	Never	Never	Never	1	Yes	Employer-sponsored plan	24	Female	4 year college graduate	NOT Hispanic or Latino	1	Good	Excellent	Excellent	Excellent	Excellent	Excellent	Completely	Rarely	Mild	0	19	19	No	No	13	14	27
483	Never	Never	Never	Never	Never	0	Yes	Employer-sponsored plan	30	Female	More than 4-year college degree	NOT Hispanic or Latino	1	Very Good	Very Good	Very Good	Very Good	Very Good	Very Good	Moderately	Rarely	Moderate	0	16	15	No	No	14	14	28
484	Never	Never	Never	Never	Never	0	Yes	Self-purchased private plan	70	Female	Some college or 2-year degree		1	Very Good	Very Good	Very Good	Very Good	Very Good	Very Good	Completely	Never	Mild	8	17	15	No	No	14	14	28
485	Never	Hardly ever	Never	Never	Never	1	No		59	Female	4 year college graduate	NOT Hispanic or Latino	1	Very Good	Excellent	Very Good	Excellent	Excellent	Excellent	Completely	Never	Mild	0	20	18	No	No	14	14	28
486	Hardly ever	Hardly ever	Hardly ever	Never	Never	3	No		60	Male	More than 4-year college degree	NOT Hispanic or Latino	2	Good	Very Good	Good	Very Good	Very Good	Very Good	Completely	Rarely	Mild	2	16	16	No	No	14	13	27
487	Never	Never	Never	Never	Never	0	Yes	Employer-sponsored plan	42	Female	4 year college graduate	NOT Hispanic or Latino	1	Very Good	Very Good	Very Good	Good	Good	Very Good	Completely	Rarely	Mild	2	14	17	No	No	14	14	28
488	Hardly ever	Never	Hardly ever	Never	Never	2	Yes	Dont know/Other	25	Male	More than 4-year college degree	NOT Hispanic or Latino	1	Excellent	Excellent	Excellent	Excellent	Excellent	Excellent	Completely	Never	Mild	1	20	18	No	No	14	14	28
489	Never	Hardly ever	Never	Never	Never	1	Don't know/Not sure		27	Female	4 year college graduate	NOT Hispanic or Latino	1	Very Good	Excellent	Excellent	Excellent	Excellent	Excellent	Completely	Rarely	Mild	0	19	19	No	No	13	13	26
490	Never	Never	Never	Never	Never	0	Yes	Employer-sponsored plan	52	Male	More than 4-year college degree		1	Very Good	Excellent	Excellent	Excellent	Excellent	Excellent	Completely	Rarely	None	5	19	18	No	No	14	14	28
491	Never	Never	Never	Never	Never	0	Yes	Employer-sponsored plan	31	Male	More than 4-year college degree	NOT Hispanic or Latino	2	Excellent	Excellent	Excellent	Excellent	Excellent	Excellent	Completely	Rarely	Mild	5	19	17	No	No	14	14	28
492	Hardly ever	Hardly ever	Hardly ever	Hardly ever	Never	4	No		64	Male	More than 4-year college degree	NOT Hispanic or Latino	1	Very Good	Very Good	Very Good	Good	Very Good	Very Good	Completely	Never	Mild	2	16	17	No	No	12	14	26
493	Never	Never	Hardly ever	Never	Never	1	Yes	Employer-sponsored plan	43	Female	4 year college graduate	NOT Hispanic or Latino	1	Very Good	Very Good	Good	Very Good	Excellent	Excellent	Completely	Never	None	1	18	17	No	No	14	14	28
494	Never	Never	Never	Never	Never	0	Yes	Employer-sponsored plan	18	Female	High school graduate or GED	NOT Hispanic or Latino	1	Good	Good	Very Good	Poor	Very Good	Excellent	Completely	Always	Mild	5	9	16	No	No	14	14	28
495	Never	Hardly ever	Hardly ever	Never	Never	2	Yes	Employer-sponsored plan	34	Female	4 year college graduate	NOT Hispanic or Latino	1	Very Good	Very Good	Very Good	Good	Very Good	Very Good	Completely	Rarely	Mild	1	15	17	No	No	13	14	27
496	Hardly ever	Occasionally	Occasionally	Never	Never	5	Yes	Employer-sponsored plan	31	Female	4 year college graduate	NOT Hispanic or Latino	2	Excellent	Very Good	Very Good	Good	Good	Good	Completely	Sometimes	Mild	2	12	17	No	No	14	14	28
497	Never	Occasionally	Occasionally	Never	Never	4	Yes	Employer-sponsored plan	47	Female	More than 4-year college degree	NOT Hispanic or Latino	1	Very Good	Very Good	Very Good	Good	Very Good	Very Good	Completely	Rarely	Mild	1	15	17	No	No	14	14	28
498	Hardly ever	Hardly ever	Occasionally	Never	Never	4	Yes	Employer-sponsored plan	56	Female	More than 4-year college degree	NOT Hispanic or Latino	1	Excellent	Excellent	Very Good	Excellent	Excellent	Excellent	Completely	Never	Mild	2	20	17	No	No	14	14	28
499	Never	Occasionally	Never	Never	Never	2	Yes	Employer-sponsored plan	40	Female	Some college or 2-year degree	NOT Hispanic or Latino	1	Good	Very Good	Fair	Good	Good	Good	Completely	Always	Moderate	0	11	15	No	No	14	14	28
501	Never	Occasionally	Never	Never	Never	2	No		67	Female	More than 4-year college degree	NOT Hispanic or Latino	1	Excellent	Excellent	Excellent	Excellent	Excellent	Excellent	Completely	Never	None	10	20	16	No	No	13	14	27
502	Hardly ever	Hardly ever	Hardly ever	Hardly ever	Hardly ever	5	No		67	Male	Some college or 2-year degree	NOT Hispanic or Latino	1	Very Good	Very Good	Very Good	Very Good	Very Good	Excellent	Completely	Never	None	1	17	18	No	No	14	14	28
503	Never	Hardly ever	Occasionally	Never	Never	3	Yes	Employer-sponsored plan	40	Female	More than 4-year college degree	NOT Hispanic or Latino	1	Very Good	Excellent	Very Good	Very Good	Very Good	Excellent	Completely	Rarely	Mild	2	17	17	No	No	14	14	28
504	Never	Never	Hardly ever	Never	Never	1	Yes	Employer-sponsored plan	22	Male	4 year college graduate	NOT Hispanic or Latino	1	Good	Very Good	Fair	Fair	Fair	Good	Completely	Often	Moderate	0	11	15	No	No	14	14	28
505	Hardly ever	Hardly ever	Hardly ever	Occasionally	Hardly ever	6	No		41	Male	Some college or 2-year degree	Hispanic or Latino	1	Good	Good	Good	Good	Excellent	Very Good	Mostly	Rarely	Moderate	5	15	13	No	No	14	13	27
506	Occasionally	Occasionally	Hardly ever	Never	Never	5	Yes	Public insurance	34	Female	Some college or 2-year degree	NOT Hispanic or Latino	1	Good	Very Good	Very Good	Good	Very Good	Good	Mostly	Sometimes	Moderate	2	13	15	No	No	14	14	28
507	Hardly ever	Never	Never	Never	Never	1	Yes	Employer-sponsored plan	67	Male	4 year college graduate	NOT Hispanic or Latino	1	Very Good	Excellent	Excellent	Excellent	Excellent	Excellent	Completely	Never	None	8	20	17	No	No	14	14	28
508	Never	Never	Never	Never	Never	0	Yes	Self-purchased private plan	65	Female	4 year college graduate	NOT Hispanic or Latino	1	Excellent	Excellent	Excellent	Excellent	Excellent	Excellent	Completely	Never	Mild	1	20	18	No	No	14	14	28
509	Never	Never	Never	Never	Never	0	Yes	Employer-sponsored plan	45	Female	4 year college graduate	NOT Hispanic or Latino	1	Very Good	Excellent	Very Good	Very Good	Very Good	Very Good	Completely	Never	Mild	0	18	18	No	No	14	14	28
510	Never	Never	Never	Never	Never	0	No		50	Female	4 year college graduate	NOT Hispanic or Latino	1	Very Good	Excellent	Excellent	Very Good	Very Good	Very Good	Completely	Never	None	0	18	20	No	No	14	14	28
511	Never	Hardly ever	Hardly ever	Never	Never	2	Yes	Self-purchased private plan	68	Female	High school graduate or GED		1	Good	Very Good	Good	Very Good	Excellent	Excellent	Completely	Rarely	Mild	5	17	15	No	No	14	14	28
512	Hardly ever	Hardly ever	Hardly ever	Hardly ever	Never	4	Yes	Employer-sponsored plan	58	Female	More than 4-year college degree	NOT Hispanic or Latino	1	Fair	Fair	Fair	Fair	Fair	Good	Mostly	Often	Moderate	3	9	13	No	No	14	13	27
513	Hardly ever	Hardly ever	Hardly ever	Never	Never	3	Yes	Employer-sponsored plan	57	Female	4 year college graduate	NOT Hispanic or Latino	1	Excellent	Excellent	Excellent	Excellent	Very Good	Excellent	Completely	Rarely	None	0	18	20	No	No	14	14	28
514	Hardly ever	Hardly ever	Occasionally	Never	Never	4	No		72	Female	More than 4-year college degree	NOT Hispanic or Latino	1	Very Good	Very Good	Very Good	Very Good	Very Good	Very Good	Mostly	Rarely	Mild	1	16	16	No	No	14	14	28
515	Never	Never	Very often	Fairly often	Never	7	Yes	Employer-sponsored plan	53	Female	Some college or 2-year degree	NOT Hispanic or Latino	1	Fair	Fair	Fair	Fair	Good	Very Good	Moderately	Sometimes	Moderate	10	9	9	No	No	12	14	26
516	Hardly ever	Never	Hardly ever	Never	Never	2	Yes	Employer-sponsored plan	47	Female	Some college or 2-year degree	NOT Hispanic or Latino	1	Very Good	Very Good	Very Good	Very Good	Very Good	Very Good	Completely	Never	Mild	0	17	18	No	No	14	14	28
517	Very often	Very often	Very often	Never	Never	12	Yes	Employer-sponsored plan	47	Male	Some college or 2-year degree	NOT Hispanic or Latino	1	Good	Good	Good	Good	Good	Good	Completely	Never	None	2	14	17	No	No	14	13	27
518	Never	Never	Never	Never	Never	0	No		75	Male	More than 4-year college degree		1	Very Good	Very Good	Very Good	Good	Very Good	Very Good	Completely	Rarely	Mild	3	15	17	No	No	14	14	28
519	Never	Never	Hardly ever	Never	Never	1	Yes	Employer-sponsored plan	60	Male	4 year college graduate	NOT Hispanic or Latino	1	Good	Very Good	Good	Good	Very Good	Very Good	Completely	Never	Mild	1	16	16	No	No	14	14	28
520	Hardly ever	Never	Hardly ever	Never	Never	2	Yes	Employer-sponsored plan	58	Female	4 year college graduate	NOT Hispanic or Latino	1	Very Good	Very Good	Very Good	Very Good	Excellent	Excellent	Completely	Rarely	Mild	0	17	18	No	No	12	12	24
521	Hardly ever	Never	Never	Never	Never	1	Yes	Employer-sponsored plan	29	Female	4 year college graduate	NOT Hispanic or Latino	1	Very Good	Very Good	Very Good	Good	Good	Very Good	Completely	Often	Mild	1	13	17	No	No	12	12	24
522	Occasionally	Occasionally	Occasionally	Hardly ever	Hardly ever	8	Yes	Employer-sponsored plan	42	Female	4 year college graduate	NOT Hispanic or Latino	1	Good	Excellent	Good	Excellent	Excellent	Excellent	Mostly	Never	Moderate	3	20	14	No	No	13	12	25
523	Never	Occasionally	Occasionally	Occasionally	Never	6	Yes	Employer-sponsored plan	71	Female	More than 4-year college degree	NOT Hispanic or Latino	1	Very Good	Excellent	Very Good	Very Good	Excellent	Excellent	Mostly	Never	Mild	4	19	15	No	No	14	14	28
524	Very often	Very often	Occasionally	Never	Never	10	Yes	Employer-sponsored plan	53	Male	High school graduate or GED	NOT Hispanic or Latino	1	Very Good	Very Good	Very Good	Very Good	Very Good	Very Good	Completely	Never	Mild	8	17	15	No	No	12	13	25
525	Occasionally	Hardly ever	Fairly often	Fairly often	Hardly ever	10	Yes	Employer-sponsored plan	54	Female	More than 4-year college degree	NOT Hispanic or Latino	1	Very Good	Very Good	Very Good	Very Good	Very Good	Very Good	Completely	Rarely	Moderate	5	16	15	No	No	14	14	28
526	Occasionally	Hardly ever	Hardly ever	Never	Never	4	Yes	Employer-sponsored plan	71	Male	More than 4-year college degree	NOT Hispanic or Latino	1	Very Good	Excellent	Very Good	Excellent	Excellent	Very Good	Completely	Never	None	1	20	18	No	No	13	14	27
527	Never	Occasionally	Occasionally	Hardly ever	Never	5	No		61	Female	Some college or 2-year degree	NOT Hispanic or Latino	1	Very Good	Very Good	Very Good	Very Good	Very Good	Very Good	Completely	Rarely	Mild	2	16	17	No	No	14	14	28
528	Occasionally	Hardly ever	Hardly ever	Never	Never	4	Yes	Employer-sponsored plan	31	Male	More than 4-year college degree	NOT Hispanic or Latino	1	Very Good	Very Good	Very Good	Good	Very Good	Very Good	Completely	Sometimes	Moderate	3	13	16	No	No	14	14	28
529	Occasionally	Hardly ever	Never	Never	Never	3	Yes	Employer-sponsored plan	30	Female	4 year college graduate	NOT Hispanic or Latino	1	Very Good	Very Good	Very Good	Very Good	Good	Very Good	Completely	Rarely	Mild	2	15	17	No	No	14	14	28
530	Hardly ever	Hardly ever	Never	Never	Never	2	Yes	Dont know/Other	70	Female	Some college or 2-year degree	NOT Hispanic or Latino	1	Excellent	Excellent	Very Good	Excellent	Excellent	Excellent	Completely	Never	None	0	20	19	No	No	14	14	28
531	Very often	Fairly often	Very often	Very often	Very often	19	Yes	Employer-sponsored plan	33	Female	More than 4-year college degree	NOT Hispanic or Latino	1	Very Good	Very Good	Very Good	Very Good	Very Good	Very Good	Completely	Rarely	Mild	7	16	15	No	No	15	14	29
532	Hardly ever	Hardly ever	Hardly ever	Hardly ever	Hardly ever	5	Yes	Employer-sponsored plan	34	Female	More than 4-year college degree	NOT Hispanic or Latino	1	Good	Good	Good	Good	Good	Good	Mostly	Sometimes	Mild	5	11	14	No	No	14	14	28
533	Never	Never	Never	Never	Never	0	Yes	Employer-sponsored plan	37	Male	Some college or 2-year degree	NOT Hispanic or Latino	1	Excellent	Very Good	Very Good	Good	Good	Good	Completely	Rarely	None	0	14	19	No	No	14	14	28
534	Never	Never	Never	Never	Never	0	Yes	Self-purchased private plan	70	Female	More than 4-year college degree	NOT Hispanic or Latino	1	Excellent	Excellent	Excellent	Excellent	Excellent	Excellent	Completely	Never	None	0	20	20	No	No	14	14	28
535	Hardly ever	Hardly ever	Never	Never	Never	2	Yes	Self-purchased private plan	72	Female	Some college or 2-year degree	NOT Hispanic or Latino	1	Good	Very Good	Very Good	Excellent	Very Good	Very Good	Completely	Never	Mild	2	18	17	No	No	14	13	27
536	Hardly ever	Hardly ever	Occasionally	Never	Never	4	No		59	Female	More than 4-year college degree	NOT Hispanic or Latino	1	Excellent	Excellent	Excellent	Excellent	Very Good	Very Good	Completely	Never	None	2	19	19	No	No	14	14	28
537	Never	Hardly ever	Never	Never	Never	1	No		52	Female	More than 4-year college degree	NOT Hispanic or Latino	1	Very Good	Excellent	Very Good	Very Good	Very Good	Very Good	Completely	Rarely	Mild	1	17	17	No	No	14	14	28
538	Never	Hardly ever	Hardly ever	Hardly ever	Hardly ever	4	Yes	Self-purchased private plan	34	Male	More than 4-year college degree	NOT Hispanic or Latino	2	Excellent	Very Good	Very Good	Very Good	Very Good	Very Good	Mostly	Rarely	Mild	8	16	14	No	No	16	15	31
539	Hardly ever	Never	Never	Never	Never	1	No		68	Male	Some college or 2-year degree	NOT Hispanic or Latino	1	Very Good	Very Good	Very Good	Very Good	Very Good	Very Good	Completely	Rarely	Mild	2	16	17	No	No	12	14	26
540	Never	Never	Never	Never	Never	0	Yes	Employer-sponsored plan	35	Male	More than 4-year college degree	NOT Hispanic or Latino	1	Very Good	Very Good	Very Good	Very Good	Very Good	Very Good	Completely	Sometimes	None	5	14	17	No	No	14	14	28
541	Never	Never	Never	Never	Never	0	Yes	Employer-sponsored plan	41	Female	4 year college graduate	NOT Hispanic or Latino	1	Excellent	Excellent	Very Good	Excellent	Excellent	Excellent	Completely	Rarely	Mild	0	19	18	No	No	16	16	32
542	Never	Never	Never	Never	Never	0	Yes	Employer-sponsored plan	57	Female	Some college or 2-year degree	NOT Hispanic or Latino	1	Very Good	Very Good	Very Good	Very Good	Very Good	Very Good	Completely	Never	None	0	17	19	No	No	12	12	24
543	Never	Never	Hardly ever	Never	Never	1	No		67	Female	More than 4-year college degree	NOT Hispanic or Latino	1	Very Good	Very Good	Very Good	Good	Very Good	Very Good	Completely	Often	Mild	1	14	17	No	No	11	12	23
544	Hardly ever	Hardly ever	Hardly ever	Never	Never	3	Yes	Self-purchased private plan	68	Male	More than 4-year college degree		1	Good	Good	Good	Good	Good	Good	Mostly	Rarely	Mild	3	13	15	No	No	14	14	28
545	Never	Never	Never	Never	Never	0	Yes	Self-purchased private plan	65	Female	Some college or 2-year degree		1	Very Good	Excellent	Very Good	Excellent	Very Good	Excellent	Completely	Never	None	1	19	18	No	No	12	13	25
546	Occasionally	Occasionally	Hardly ever	Hardly ever	Hardly ever	7	Yes	Public insurance	30	Female	Some college or 2-year degree	NOT Hispanic or Latino	1	Very Good	Very Good	Very Good	Very Good	Very Good	Very Good	Mostly	Never	Moderate	5	17	14	No	No	13	14	27
547	Hardly ever	Never	Never	Never	Never	1	Yes	Self-purchased private plan	25	Male	More than 4-year college degree	NOT Hispanic or Latino	1	Very Good	Good	Good	Good	Poor	Poor	Completely	Often	Moderate	5	10	14	No	No	14	15	29
548	Hardly ever	Occasionally	Occasionally	Never	Never	5	Yes	Public insurance	67	Female	More than 4-year college degree	NOT Hispanic or Latino	1	Very Good	Very Good	Good	Good	Very Good	Very Good	Moderately	Often	Moderate	7	14	11	No	No	13	12	25
550	Occasionally	Occasionally	Hardly ever	Hardly ever	Hardly ever	7	Yes	Employer-sponsored plan	29	Female	More than 4-year college degree	NOT Hispanic or Latino	1	Excellent	Very Good	Excellent	Very Good	Very Good	Very Good	Completely	Rarely	Mild	2	16	18	No	No	14	14	28
551	Never	Never	Never	Never	Never	0	Yes	Employer-sponsored plan	65	Male	Some college or 2-year degree	NOT Hispanic or Latino	1	Very Good	Very Good	Very Good	Very Good	Very Good	Very Good	Completely	Never	None	0	17	19	Yes	No	0	9	9
552	Never	Never	Hardly ever	Never	Never	1	Yes	Dont know/Other	67	Female	4 year college graduate	NOT Hispanic or Latino	1	Very Good	Very Good	Very Good	Excellent	Very Good	Excellent	Completely	Never	None	0	18	19	No	No	14	13	27
553	Occasionally	Occasionally	Hardly ever	Hardly ever	Never	6	Yes	Employer-sponsored plan	64	Female	More than 4-year college degree	NOT Hispanic or Latino	2	Good	Very Good	Very Good	Very Good	Very Good	Very Good	Completely	Sometimes	None	1	14	18	No	No	14	14	28
554	Never	Never	Never	Occasionally	Never	2	Yes	Public insurance	76	Male	More than 4-year college degree	NOT Hispanic or Latino	1	Good	Good	Good	Good	Good	Good	Mostly	Sometimes	None	10	11	13	No	No	10	8	18
555	Occasionally	Hardly ever	Fairly often	Never	Never	6	Yes	Dont know/Other	78	Male	4 year college graduate	NOT Hispanic or Latino	1	Good	Good	Good	Good	Good	Good	Mostly	Never	Mild	4	14	14	No	No	0	3	3
556	Never	Hardly ever	Never	Never	Never	1	No		70	Male	More than 4-year college degree	NOT Hispanic or Latino	1	Good	Good	Good	Good	Good	Good	Moderately	Rarely	Mild	1	13	14	No	No	14	14	28
557	Hardly ever	Hardly ever	Hardly ever	Hardly ever	Hardly ever	5	No		69	Female	4 year college graduate	NOT Hispanic or Latino	1	Good	Good	Good	Good	Good	Good	Mostly	Rarely	Mild	5	13	14	No	No	14	13	27
558	Never	Never	Never	Never	Never	0	Yes	Employer-sponsored plan	63	Female	More than 4-year college degree	NOT Hispanic or Latino	1	Very Good	Very Good	Very Good	Very Good	Very Good	Very Good	Completely	Sometimes	Mild	0	14	18	No	No	14	14	28
559	Hardly ever	Never	Never	Never	Never	1	Don't know/Not sure		31	Female	4 year college graduate	NOT Hispanic or Latino	2	Very Good	Excellent	Excellent	Very Good	Very Good	Very Good	Completely	Rarely	Mild	2	17	18	No	No	10	10	20
560	Never	Never	Never	Never	Never	0	No		19	Female	Some college or 2-year degree	NOT Hispanic or Latino	1	Very Good	Very Good	Very Good	Very Good	Very Good	Very Good	Completely	Sometimes	Mild	0	14	18	No	No	14	14	28
561	Occasionally	Hardly ever	Occasionally	Never	Never	5	Yes	Employer-sponsored plan	61	Female	Some college or 2-year degree	NOT Hispanic or Latino	1	Very Good	Very Good	Very Good	Very Good	Very Good	Very Good	Completely	Never	None	2	17	18	No	No	15	16	31
562	Never	Never	Never	Never	Never	0	Yes	Employer-sponsored plan	41	Male	Some college or 2-year degree	NOT Hispanic or Latino	2	Good	Good	Good	Good	Good	Excellent	Completely	Sometimes	Moderate	7	11	13	No	No	13	15	28
563	Never	Never	Hardly ever	Never	Never	1	Yes	Dont know/Other	76	Female	4 year college graduate	NOT Hispanic or Latino	1	Very Good	Excellent	Very Good	Excellent	Excellent	Excellent	Completely	Never	None	0	20	19	No	No	11	12	23
564	Never	Never	Never	Never	Never	0	Yes	Public insurance	63	Female	4 year college graduate		1	Excellent	Excellent	Excellent	Excellent	Excellent	Excellent	Completely	Rarely	None	10	19	16	No	No	14	16	30
565	Never	Never	Never	Never	Never	0	Yes	Employer-sponsored plan	41	Male	4 year college graduate	NOT Hispanic or Latino	1	Excellent	Excellent	Excellent	Excellent	Excellent	Excellent	Completely	Never	Mild	3	20	18	No	No	14	14	28
566	Fairly often	Occasionally	Occasionally	Fairly often	Hardly ever	11	Yes	Employer-sponsored plan	26	Male	High school graduate or GED	Hispanic or Latino	2	Good	Good	Good	Good	Good	Good	A little	Often	Moderate	2	12	12	No	No	14	14	28
567	Occasionally	Hardly ever	Hardly ever	Never	Never	4	Yes	Employer-sponsored plan	45	Female	More than 4-year college degree	NOT Hispanic or Latino	1	Good	Good	Good	Good	Fair	Fair	Mostly	Rarely	Moderate	1	12	14	No	No	14	14	28
568	Never	Hardly ever	Hardly ever	Never	Never	2	Yes	Employer-sponsored plan	20	Female	Some college or 2-year degree	NOT Hispanic or Latino	1	Very Good	Very Good	Very Good	Good	Very Good	Very Good	Completely	Rarely	Moderate	0	15	17	No	No	14	14	28
569	Never	Never	Never	Never	Never	0	Yes	Employer-sponsored plan	28	Female	More than 4-year college degree	NOT Hispanic or Latino	1	Very Good	Excellent	Very Good	Very Good	Very Good	Very Good	Completely	Rarely	None	0	17	19	No	No	14	14	28
570	Never	Occasionally	Never	Never	Never	2	Yes	Employer-sponsored plan	42	Male	More than 4-year college degree	NOT Hispanic or Latino	2	Good	Good	Good	Very Good	Very Good	Very Good	Completely	Never	Moderate	8	16	13	No	No	14	12	26
571	Never	Never	Never	Never	Never	0	No		41	Female	More than 4-year college degree	NOT Hispanic or Latino	2	Very Good	Very Good	Very Good	Very Good	Very Good	Very Good	Completely	Sometimes	Mild	2	14	17	No	No	14	14	28
572	Hardly ever	Never	Occasionally	Never	Never	3	Yes	Employer-sponsored plan	60	Female	More than 4-year college degree	NOT Hispanic or Latino	1	Excellent	Excellent	Excellent	Very Good	Very Good	Very Good	Mostly	Never	None	5	18	17	No	No	12	12	24
573	Never	Never	Never	Never	Never	0	Yes	Employer-sponsored plan	46	Female	4 year college graduate	NOT Hispanic or Latino	1	Very Good	Very Good	Good	Very Good	Good	Good	Completely	Never	Mild	0	16	17	No	No	14	14	28
574	Never	Never	Hardly ever	Never	Never	1	Yes	Employer-sponsored plan	18	Female	Some college or 2-year degree	Hispanic or Latino	2	Very Good	Excellent	Good	Good	Good	Very Good	Completely	Rarely	Mild	1	15	16	No	No	14	14	28
575	Never	Hardly ever	Never	Never	Never	1	No		88	Male	More than 4-year college degree	NOT Hispanic or Latino	1	Excellent	Excellent	Excellent	Excellent	Excellent	Excellent	Completely	Never	Mild	0	20	19	No	No	14	14	28
576	Never	Hardly ever	Hardly ever	Never	Never	2	Yes	Employer-sponsored plan	45	Male	4 year college graduate	NOT Hispanic or Latino	1	Good	Very Good	Very Good	Good	Very Good	Very Good	Completely	Sometimes	Mild	0	13	18	No	No	14	14	28
577	Occasionally	Never	Never	Never	Never	2	Yes	Employer-sponsored plan	25	Female	More than 4-year college degree	NOT Hispanic or Latino	1	Good	Good	Good	Fair	Fair	Good	Completely	Often	Moderate	1	10	15	No	No	12	12	24
578	Never	Never	Never	Never	Never	0	Yes	Employer-sponsored plan	55	Female	4 year college graduate	NOT Hispanic or Latino	1	Very Good	Very Good	Very Good	Excellent	Excellent	Excellent	Completely	Rarely	Mild	1	18	17	No	No	14	14	28
579	Hardly ever	Hardly ever	Never	Never	Hardly ever	3	Yes	Employer-sponsored plan	47	Female	Some college or 2-year degree	NOT Hispanic or Latino	1	Fair	Good	Fair	Good	Good	Good	Mostly	Often	Moderate	5	12	12	No	No	14	14	28
580	Occasionally	Occasionally	Occasionally	Never	Never	6	No		44	Female	More than 4-year college degree	NOT Hispanic or Latino	1	Fair	Fair	Fair	Fair	Fair	Fair	Moderately	Rarely	Moderate	6	10	11	No	No	14	14	28
581	Never	Never	Hardly ever	Never	Never	1	Yes	Employer-sponsored plan	28	Female	4 year college graduate	NOT Hispanic or Latino	1	Good	Good	Good	Very Good	Good	Good	Mostly	Never	Mild	0	15	16	No	No	13	14	27
582	Hardly ever	Hardly ever	Occasionally	Never	Hardly ever	5	No		36	Female	4 year college graduate	NOT Hispanic or Latino	1	Very Good	Good	Good	Good	Fair	Good	Mostly	Sometimes	Mild	1	10	15	No	No	14	14	28
583	Never	Never	Never	Never	Never	0	Yes	Employer-sponsored plan	18	Female	High school graduate or GED	NOT Hispanic or Latino	1	Excellent	Excellent	Excellent	Excellent	Excellent	Excellent	Completely	Never	None	5	20	18	No	No	14	14	28
584	Never	Never	Never	Never	Never	0	Yes	Employer-sponsored plan	61	Female	Some college or 2-year degree		1	Very Good	Very Good	Very Good	Very Good	Very Good	Very Good	Completely	Sometimes	Mild	1	14	17	No	No	13	14	27
585	Occasionally	Never	Occasionally	Never	Never	4	Yes	Employer-sponsored plan	37	Female	More than 4-year college degree	NOT Hispanic or Latino	1	Good	Very Good	Fair	Good	Very Good	Good	Mostly	Sometimes	Moderate	0	13	14	No	No	12	12	24
586	Never	Hardly ever	Never	Never	Never	1	Yes	Employer-sponsored plan	61	Male	Some college or 2-year degree	NOT Hispanic or Latino	1	Very Good	Very Good	Excellent	Very Good	Excellent	Excellent	Completely	Never	Mild	1	18	18	No	Yes	12	8	20
587	Occasionally	Hardly ever	Fairly often	Never	Hardly ever	7	Yes	Employer-sponsored plan	35	Female	Some college or 2-year degree	NOT Hispanic or Latino	1	Good	Good	Good	Good	Good	Good	Completely	Often	Mild	0	12	17	No	No	14	14	28
588	Never	Never	Hardly ever	Never	Never	1	Yes	Employer-sponsored plan	54	Male	4 year college graduate	NOT Hispanic or Latino	1	Very Good	Very Good	Very Good	Very Good	Very Good	Very Good	Completely	Rarely	Mild	2	16	17	No	No	14	14	28
589	Never	Hardly ever	Hardly ever	Never	Never	2	Yes	Employer-sponsored plan	18	Female	High school graduate or GED	NOT Hispanic or Latino	1	Good	Very Good	Good	Good	Very Good	Excellent	Moderately	Often	Mild	6	14	13	No	No	12	14	26
590	Never	Never	Never	Never	Never	0	Yes	Dont know/Other	18	Female	High school graduate or GED	Hispanic or Latino	2	Excellent	Excellent	Excellent	Excellent	Excellent	Excellent	Completely	Never	None	0	20	20	No	No	0	0	0
591	Never	Hardly ever	Fairly often	Never	Never	4	Yes	Employer-sponsored plan	23	Male	4 year college graduate	NOT Hispanic or Latino	1	Very Good	Very Good	Very Good	Poor	Good	Good	Mostly	Always	Mild	0	9	17	No	No	14	14	28
592	Never	Never	Hardly ever	Never	Never	1	Yes	Employer-sponsored plan	23	Female	4 year college graduate	NOT Hispanic or Latino	1	Good	Very Good	Good	Good	Good	Good	Completely	Rarely	Moderate	0	14	16	No	No	14	14	28
593	Never	Never	Never	Never	Never	0	Yes	Employer-sponsored plan	63	Female	4 year college graduate	NOT Hispanic or Latino	1	Good	Very Good	Good	Good	Good	Good	Completely	Never	None	0	15	18	No	No	14	14	28
595	Never	Never	Never	Never	Never	0	Yes	Employer-sponsored plan	46	Female	4 year college graduate	NOT Hispanic or Latino	1	Very Good	Very Good	Very Good	Good	Very Good	Very Good	Completely	Rarely	Mild	3	15	17	No	No	13	14	27
596	Never	Never	Never	Never	Never	0	Yes	Employer-sponsored plan	34	Female	More than 4-year college degree	NOT Hispanic or Latino	1	Excellent	Excellent	Excellent	Excellent	Excellent	Excellent	Completely	Never	None	0	20	20	No	No	14	14	28
597	Never	Never	Never	Never	Never	0	Don't know/Not sure		19	Male	Some college or 2-year degree	NOT Hispanic or Latino	1	Excellent	Excellent	Excellent	Excellent	Excellent	Very Good	Completely	Rarely	Mild	1	19	18	No	No	16	16	32
598	Occasionally	Occasionally	Hardly ever	Hardly ever	Hardly ever	7	Yes	Employer-sponsored plan	58	Male	4 year college graduate	NOT Hispanic or Latino	1	Very Good	Excellent	Very Good	Excellent	Good	Very Good	Completely	Rarely	Mild	2	17	17	No	No	13	14	27
599	Never	Never	Occasionally	Never	Never	2	Yes	Employer-sponsored plan	30	Female	More than 4-year college degree	NOT Hispanic or Latino	1	Excellent	Very Good	Excellent	Very Good	Very Good	Very Good	Completely	Never	Mild	0	17	19	No	No	14	14	28
600	Never	Never	Hardly ever	Never	Never	1	Yes	Employer-sponsored plan	49	Male	4 year college graduate	NOT Hispanic or Latino	1	Very Good	Excellent	Good	Very Good	Very Good	Excellent	Mostly	Never	Mild	0	18	16	No	No	14	14	28
601	Occasionally	Occasionally	Very often	Hardly ever	Hardly ever	10	Yes	Employer-sponsored plan	19	Female	Some college or 2-year degree	NOT Hispanic or Latino	1	Fair	Good	Fair	Poor	Poor	Very Good	Completely	Always	Moderate	1	6	14	No	No	14	14	28
602	Never	Never	Hardly ever	Never	Never	1	Yes	Dont know/Other	20	Male	Some college or 2-year degree	NOT Hispanic or Latino	1	Excellent	Excellent	Excellent	Very Good	Very Good	Excellent	Completely	Rarely	Mild	0	17	19	No	No	14	14	28
603	Occasionally	Occasionally	Occasionally	Never	Occasionally	8	Yes	Public insurance	37	Female	4 year college graduate	NOT Hispanic or Latino	1	Good	Very Good	Good	Very Good	Very Good	Very Good	Completely	Never	Mild	6	17	15	No	No	14	11	25
604	Never	Never	Fairly often	Never	Never	3	Yes	Employer-sponsored plan	25	Male	More than 4-year college degree	NOT Hispanic or Latino	1	Very Good	Very Good	Good	Excellent	Very Good	Very Good	Completely	Sometimes	None	0	15	18	No	No	14	14	28
605	Never	Never	Never	Never	Never	0	Yes	Self-purchased private plan	26	Female	More than 4-year college degree	NOT Hispanic or Latino	2	Good	Very Good	Good	Fair	Fair	Good	Completely	Always	Severe	5	9	13	No	No	14	14	28
606	Hardly ever	Never	Hardly ever	Never	Never	2	No		81	Female	More than 4-year college degree	NOT Hispanic or Latino	1	Excellent	Very Good	Excellent	Excellent	Excellent	Very Good	Completely	Rarely	Moderate	5	18	16	No	No	14	15	29
607	Hardly ever	Hardly ever	Never	Never	Never	2	Yes	Employer-sponsored plan	51	Male	More than 4-year college degree	NOT Hispanic or Latino	1	Good	Very Good	Very Good	Good	Good	Good	Completely	Sometimes	Mild	0	12	18	No	No	12	12	24
608	Never	Never	Never	Never	Never	0	Yes	Employer-sponsored plan	31	Female	More than 4-year college degree	NOT Hispanic or Latino	2	Excellent	Very Good	Very Good	Very Good	Very Good	Very Good	Completely	Sometimes	Moderate	5	14	15	No	No	14	14	28
609	Occasionally	Never	Occasionally	Never	Never	4	Yes	Dont know/Other	29	Female	More than 4-year college degree	NOT Hispanic or Latino	1	Very Good	Very Good	Very Good	Very Good	Very Good	Very Good	Completely	Rarely	Mild	2	16	17	No	No	14	14	28
610	Never	Never	Never	Never	Never	0	Yes	Employer-sponsored plan	20	Female	Some college or 2-year degree	NOT Hispanic or Latino	1	Excellent	Excellent	Excellent	Excellent	Excellent	Excellent	Completely	Never	None	5	20	18	No	No	14	14	28
611	Never	Never	Never	Never	Never	0	Yes	Employer-sponsored plan	20	Male	4 year college graduate	NOT Hispanic or Latino	1	Excellent	Excellent	Excellent	Excellent	Excellent	Excellent	Completely	Never	Mild	0	20	19	No	No	15	16	31
612	Never	Never	Never	Never	Never	0	Yes	Employer-sponsored plan	18	Female	High school graduate or GED	NOT Hispanic or Latino	1	Excellent	Excellent	Excellent	Excellent	Excellent	Excellent	Completely	Rarely	None	2	19	19	No	No	14	14	28
613	Never	Never	Never	Never	Never	0	Yes	Employer-sponsored plan	43	Female	Some college or 2-year degree	NOT Hispanic or Latino	1	Very Good	Excellent	Very Good	Very Good	Excellent	Excellent	Completely	Never	None	1	19	18	No	No	14	13	27
614	Hardly ever	Hardly ever	Fairly often	Never	Never	5	Yes	Employer-sponsored plan	40	Female	4 year college graduate	NOT Hispanic or Latino	1	Very Good	Very Good	Very Good	Very Good	Very Good	Very Good	Completely	Rarely	Mild	0	16	18	No	No	14	14	28
615	Never	Never	Never	Never	Never	0	Yes	Employer-sponsored plan	25	Female	More than 4-year college degree	NOT Hispanic or Latino	1	Excellent	Excellent	Excellent	Very Good	Very Good	Excellent	Completely	Rarely	Mild	1	17	18	No	No	14	14	28
617	Hardly ever	Never	Occasionally	Never	Never	3	Yes	Employer-sponsored plan	37	Female	More than 4-year college degree		1	Very Good	Excellent	Very Good	Very Good	Excellent	Very Good	Completely	Never	Mild	0	19	18	No	No	14	14	28
618	Very often	Very often	Very often	Very often	Very often	20	No		43	Female	More than 4-year college degree	NOT Hispanic or Latino	2	Very Good	Excellent	Fair	Excellent	Excellent	Excellent	Completely	Rarely	Mild	10	19	12	No	No	6	11	17
619	Occasionally	Occasionally	Occasionally	Hardly ever	Never	7	No		75	Male	4 year college graduate	NOT Hispanic or Latino	1	Very Good	Very Good	Very Good	Very Good	Very Good	Very Good	Completely	Never	Mild	0	17	18	No	No	11	8	19
620	Never	Hardly ever	Never	Never	Never	1	Yes	Employer-sponsored plan	25	Female	Some college or 2-year degree	NOT Hispanic or Latino	1	Fair	Good	Poor	Fair	Good	Good	A little	Always	Moderate	4	9	9	No	No	14	14	28
621	Hardly ever	Hardly ever	Never	Never	Never	2	Yes	Employer-sponsored plan	23	Male	4 year college graduate	NOT Hispanic or Latino	1	Very Good	Fair	Good	Poor	Good	Very Good	Completely	Often	Severe	2	9	14	No	No	14	14	28
622	Hardly ever	Occasionally	Hardly ever	Never	Hardly ever	5	Yes	Employer-sponsored plan	23	Female	4 year college graduate	NOT Hispanic or Latino	2	Good	Good	Fair	Fair	Fair	Fair	Completely	Sometimes	None	0	9	17	No	No	14	14	28
623	Never	Never	Occasionally	Never	Never	2	Yes	Employer-sponsored plan	46	Male	High school graduate or GED	NOT Hispanic or Latino	1	Good	Good	Good	Very Good	Good	Very Good	Completely	Rarely	Mild	3	14	16	No	No	14	14	28
624	Never	Hardly ever	Occasionally	Never	Never	3	Yes	Dont know/Other	71	Female	More than 4-year college degree	NOT Hispanic or Latino	1	Excellent	Excellent	Excellent	Excellent	Excellent	Excellent	Completely	Never	None	0	20	20	No	No	11	12	23
625	Very often	Fairly often	Very often	Never	Very often	15	Don't know/Not sure		51	Female	Some college or 2-year degree	NOT Hispanic or Latino	1	Good	Fair	Fair	Poor	Fair	Fair	Moderately	Always	Moderate	5	6	11	No	No	9	10	19
626	Never	Never	Never	Never	Never	0	Yes	Employer-sponsored plan	22	Female	4 year college graduate	NOT Hispanic or Latino	2	Good	Good	Good	Good	Very Good	Very Good	Completely	Rarely	Mild	1	14	16	No	No	14	14	28
627	Hardly ever	Very often	Hardly ever	Hardly ever	Occasionally	9	No		22	Male	4 year college graduate		1	Good	Good	Good	Good	Good	Good	Moderately	Sometimes	Moderate	5	11	12	No	No	1	0	1
628	Never	Never	Never	Never	Never	0	No		65	Male	More than 4-year college degree	NOT Hispanic or Latino	1	Good	Excellent	Very Good	Very Good	Very Good	Excellent	Mostly	Rarely	Mild	2	17	16	No	No	14	14	28
629	Hardly ever	Never	Occasionally	Never	Never	3	Yes	Employer-sponsored plan	25	Male	4 year college graduate	NOT Hispanic or Latino	1	Good	Very Good	Good	Very Good	Excellent	Excellent	Completely	Never	Mild	1	18	16	No	No	14	14	28
631	Never	Never	Never	Never	Never	0	No		26	Female	More than 4-year college degree	NOT Hispanic or Latino	2	Excellent	Excellent	Excellent	Excellent	Excellent	Excellent	Completely	Never	None	0	20	20	No	No	12	12	24
632	Never	Hardly ever	Never	Never	Never	1	Yes	Employer-sponsored plan	19	Female	Some college or 2-year degree	NOT Hispanic or Latino	1	Good	Very Good	Fair	Fair	Very Good	Very Good	Completely	Always	Moderate	6	11	13	No	No	12	12	24
633	Never	Never	Never	Never	Never	0	Yes	Dont know/Other	21	Female	4 year college graduate	NOT Hispanic or Latino	2	Very Good	Very Good	Very Good	Very Good	Excellent	Very Good	Mostly	Sometimes	Mild	7	15	14	No	No	14	14	28
634	Occasionally	Never	Very often	Never	Never	6	Yes	Employer-sponsored plan	21	Female	Some college or 2-year degree	NOT Hispanic or Latino	2	Fair	Excellent	Very Good	Very Good	Good	Very Good	Completely	Rarely	Mild	6	16	16	No	No	14	14	28
635	Never	Hardly ever	Hardly ever	Never	Hardly ever	3	Yes	Employer-sponsored plan	24	Male	More than 4-year college degree	NOT Hispanic or Latino	2	Very Good	Very Good	Very Good	Excellent	Excellent	Very Good	Completely	Rarely	Mild	0	18	18	No	No	16	16	32
636	Occasionally	Occasionally	Hardly ever	Occasionally	Hardly ever	8	Yes	Employer-sponsored plan	40	Male	More than 4-year college degree		2	Very Good	Very Good	Very Good	Excellent	Very Good	Very Good	Mostly	Never	None	1	18	17	No	No	16	14	30
637	Never	Never	Occasionally	Never	Never	2	Yes	Employer-sponsored plan	33	Female	4 year college graduate		2	Fair	Good	Good	Good	Good	Good	Moderately	Never	None	5	14	14	No	No	16	16	32
638	Occasionally	Never	Never	Never	Never	2	Yes	Employer-sponsored plan	36	Female	4 year college graduate	NOT Hispanic or Latino	1	Good	Fair	Good	Fair	Fair	Fair	Completely	Sometimes	Moderate	2	8	15	No	No	14	14	28
639	Occasionally	Hardly ever	Hardly ever	Never	Hardly ever	5	Yes	Employer-sponsored plan	36	Female	More than 4-year college degree	NOT Hispanic or Latino	1	Very Good	Very Good	Very Good	Very Good	Very Good	Very Good	Completely	Never	None	5	17	17	No	No	14	14	28
640	Never	Never	Never	Never	Never	0	Yes	Employer-sponsored plan	25	Male	More than 4-year college degree	NOT Hispanic or Latino	1	Excellent	Excellent	Excellent	Excellent	Excellent	Excellent	Completely	Never	Mild	0	20	19	No	No	16	16	32
641	Occasionally	Never	Hardly ever	Never	Never	3	Yes	Employer-sponsored plan	25	Female	4 year college graduate	NOT Hispanic or Latino	1	Very Good	Very Good	Very Good	Very Good	Very Good	Very Good	Completely	Often	Mild	0	15	18	No	No	14	14	28
642	Never	Hardly ever	Occasionally	Never	Never	3	Yes	Employer-sponsored plan	30	Male	More than 4-year college degree	NOT Hispanic or Latino	1	Good	Very Good	Good	Good	Good	Very Good	Completely	Sometimes	Mild	0	12	17	No	No	14	16	30
643	Never	Never	Never	Never	Never	0	Yes	Employer-sponsored plan	30	Female	4 year college graduate	NOT Hispanic or Latino	1	Very Good	Excellent	Very Good	Excellent	Excellent	Excellent	Completely	Rarely	Mild	1	19	17	No	No	14	14	28
644	Hardly ever	Hardly ever	Never	Never	Never	2	No		61	Female	High school graduate or GED	NOT Hispanic or Latino	1	Good	Very Good	Good	Very Good	Good	Very Good	Completely	Rarely	Mild	2	15	16	No	No	12	12	24
645	Fairly often	Never	Never	Never	Never	3	Yes	Employer-sponsored plan	64	Female	More than 4-year college degree	NOT Hispanic or Latino	1	Excellent	Excellent	Excellent	Very Good	Very Good	Excellent	Completely	Rarely	None	0	17	20	No	No	14	14	28
646	Occasionally	Occasionally	Occasionally	Never	Hardly ever	7	Yes	Employer-sponsored plan	42	Female	4 year college graduate	NOT Hispanic or Latino	1	Good	Good	Good	Good	Good	Very Good	Completely	Sometimes	Mild	3	11	16	No	No	14	14	28
648	Hardly ever	Hardly ever	Hardly ever	Never	Never	3	Yes	Employer-sponsored plan	35	Female	More than 4-year college degree	NOT Hispanic or Latino	1	Very Good	Very Good	Very Good	Very Good	Very Good	Very Good	Completely	Rarely	Mild	0	16	18	No	No	14	14	28
649	Hardly ever	Hardly ever	Occasionally	Never	Never	4	Yes	Employer-sponsored plan	33	Male	4 year college graduate	NOT Hispanic or Latino	1	Good	Very Good	Good	Good	Excellent	Very Good	Completely	Rarely	Mild	2	16	16	No	No	12	14	26
650	Very often	Very often	Very often	Very often	Very often	20	Yes	Public insurance	18	Male	High school graduate or GED		2	Very Good	Very Good	Very Good	Very Good	Very Good	Very Good	Completely	Always	Very Severe	8	13	12	No	No	16	16	32
651	Never	Hardly ever	Hardly ever	Never	Never	2	Yes	Public insurance	23	Female	Some college or 2-year degree	NOT Hispanic or Latino	2	Very Good	Very Good	Excellent	Very Good	Excellent	Excellent	Mostly	Sometimes	Mild	1	15	17	No	No	14	14	28
